# Supplementary material for: Direct bromination of hydrocarbons catalyzed by Li2MnO3 under oxygen and photo-irradiation conditions
Source: Royal Society of Chemistry journal article supplement (doi:10.1039/c2ra22197g), 2012-12-13

## Supporting Information

### **Direct Bromination of Hydrocarbons Catalyzed by $\text{Li}_2\text{MnO}_3$ under Oxygen and Photo-Irradiation Conditions**

Yuta Nishina,\* Junya Morita, and Bunsho Ohtani

## Table of contents

|                                                                |    |
|----------------------------------------------------------------|----|
| Materials and Methods                                          | 3  |
| S1 Preparation of $\text{Li}_2\text{MnO}_3$                    | 5  |
| S2 Analysis of $\text{MnO}_2$ after bromination                | 6  |
| S3 Bromination of cyclohexane with other reagents and catalyst | 7  |
| S4 Catalyst recycling                                          | 8  |
| S5 Monochromatic irradiation-action spectrum analysis          | 9  |
| References                                                     | 11 |
| NMR spectra                                                    | 12 |

## Materials and Methods

**XRD measurements** X-ray diffraction patterns were obtained on an X-ray powder diffractometer (Rigaku RINT-2000) using Cu K $\alpha$  radiation.

**XAFS measurements** XAFS data were collected using beamline BL9C at the Photon Factory (IMMS, KEK, Tsukuba, Japan). Commercially available MnO<sub>2</sub> and MnBr<sub>2</sub> were measured as standard samples. Data were analysed with the Athena software program.

**NMR measurements** NMR spectra were recorded using a JEOL JNM-LA400 spectrometer. Proton chemical shifts are relative to solvent peaks [chloroform: 7.27 (<sup>1</sup>H), 77.00 (<sup>13</sup>C)]. The NMR spectra of organobromides **2a-h**, **2e'** and **3a** showed complete agreement with the known data.

**Action spectrum analysis** For action spectra analyses, 5.8 mg of Li<sub>2</sub>MnO<sub>3</sub> powder and 0.5 mmol of Br<sub>2</sub> were suspended in 4 mL of cyclohexane, then irradiated for 1 h using a diffraction grating type illuminator (Jasco CRM-FD) equipped with a 300 W xenon lamp (Hamamatsu Photonics C2578-02). The intensity of irradiation, measured by optical power metre (Hioki 3664), was in the range (2.6–6.7)  $\times 10^{-8}$  einstein s<sup>-1</sup>.

Full-width at half-maximum (FWHM) of the monochromatic light was ~15 nm, irrespective of the wavelength. During irradiation, the reaction mixture was stirred continuously. After irradiation, the reaction mixture was quenched with aq.  $\text{Na}_2\text{S}_2\text{O}_3$ , and then analyzed by gas chromatography with dodecane as an internal standard. The formula for computation is shown in **S4**.

### **S1 Preparation of $\text{Li}_2\text{MnO}_3$**

$\text{Mn}_2\text{O}_3$  (5 mmol) and  $\text{Li}_2\text{CO}_3$  (10 mmol) were mixed and heated initially at 600 °C to decompose the  $\text{Li}_2\text{CO}_3$  for 2 h, then temperature was increased to 900 °C and kept for 16 h. After cooling to room temperature, the brown solid was washed with 1 M  $\text{H}_2\text{SO}_4$ , and then dried at 120 °C for 3 h.

## S2 Analysis of MnO<sub>2</sub> after the reaction

### a. Difference in appearance

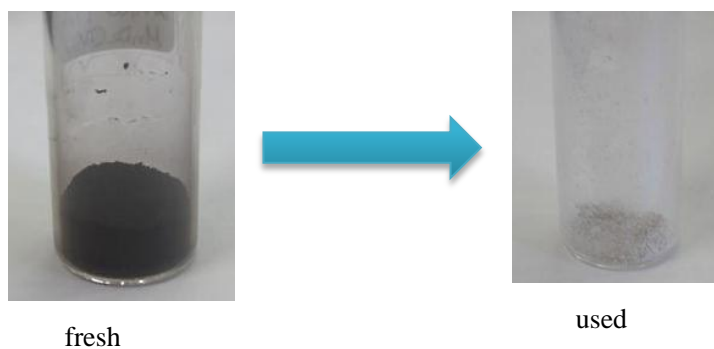

After bromination of cyclohexane using catalytic MnO<sub>2</sub>, the recovered catalyst got gray and hydroscopic.

### b. XAFS analysis

Since the recovered catalyst was highly hydroscopic, XRD measurement was unsuccessful. We performed XAFS analysis to determine the oxidation state of Mn. The recovered catalyst showed similar XANES and EXAFS spectra of MnBr<sub>2</sub>.

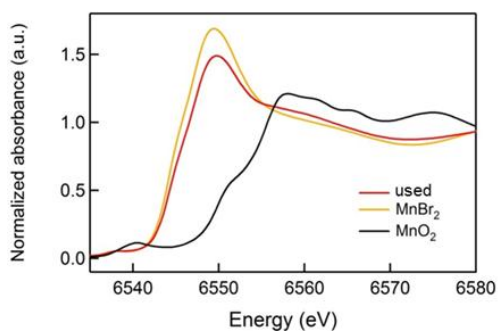

XANES analysis

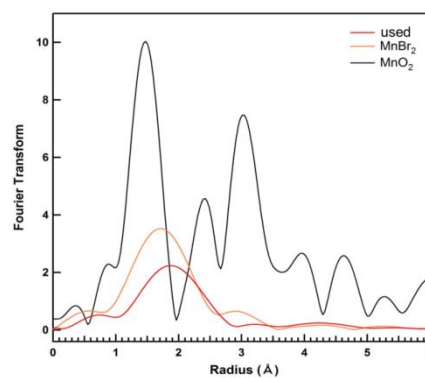

EXAFS analysis

### S3 Bromination of cyclohexane with other reagents and catalyst

To compare the catalytic reactivity of  $\text{Li}_2\text{MnO}_3$ , known reagents and catalyst were investigated.

**Table S1. Bromination of cyclohexane.**

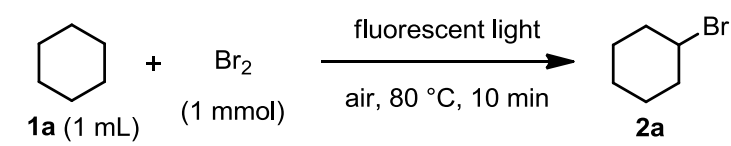

| entry          | additive or catalyst                             | yield /% |
|----------------|--------------------------------------------------|----------|
| 1 <sup>a</sup> | AcOH (excess)                                    | 13       |
| 2 <sup>b</sup> | <sup>t</sup> BuONa (1 mmol)                      | 35       |
| 3 <sup>c</sup> | 2AlBr <sub>3</sub> /CBr <sub>4</sub> (0.08 mmol) | 59       |
| 4 <sup>d</sup> | MnO <sub>2</sub> (2 mmol)                        | 77       |

**a:** In ref *S1*, the reaction was performed for 24 h and gave **2a** in 13% yield. **b:** in ref *S2*, the reaction was performed at 40 °C for 15 h and gave **2a** in 100% yield. **c:** The polyhalogenation occurred in this reaction condition. In ref *S3*, the reaction was performed at -20 °C for 1 h and gave **1'** in 75% yield. **d:** In ref *S4*, **2a** was obtained in 100% yield.

## S4 Catalyst recycling

Table S2. Catalyst recycling.<sup>a</sup>

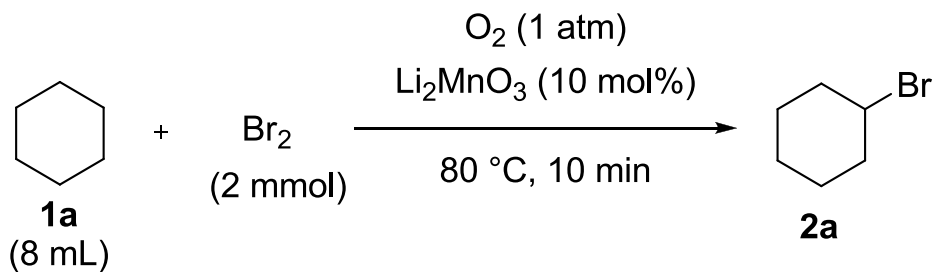

| cycle     | 1  | 2  | 3  | 4  | 5  |
|-----------|----|----|----|----|----|
| yield (%) | 83 | 84 | 85 | 84 | 82 |

<sup>a</sup>After each of the reactions, reaction mixture was decanted. The residual was washed with cyclohexane, dried in vacuo for 10 min, and next substrates **1a** and Br<sub>2</sub> was added.



## S5 Monochromatic irradiation-action spectrum analysis

We speculated that formation of one molecule of bromocyclohexane (**2a**) requires one photon, and formation of one molecule of dibromocyclohexane (**3a**) requires two photons.

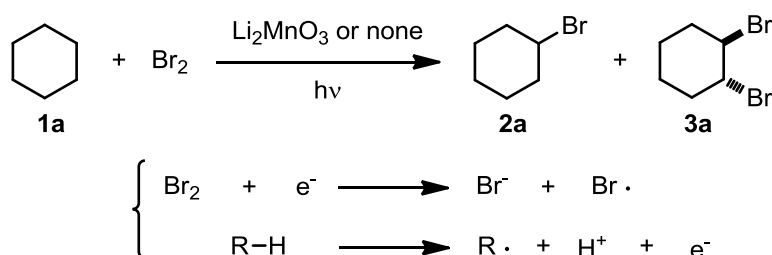

$$\begin{aligned} \text{photon efficiency} &= \frac{\text{used amount of photon in mono-bromination} + \text{used amount of photon in di-bromination}}{\text{(total amount of photon)}} \\ &= \frac{\text{amount of bromocyclohexane} + \text{amount of dibromocyclohexane} \times 2}{\text{(total amount of photon)}} \end{aligned}$$

We measured light intensity at various wavelengths with an optical power meter (HIOKI Optical Power Meter 3664). We measured the numbers of product molecules **2a** and **3a** with a gas chromatography (Shimadzu GC-2014) using dodecane as an internal standard. Detailed analysis data were shown in Table S2.

**Table S2.** Calculation of apparent quantum efficiency. **(A)** Reactions were performed in the presence of  $\text{Li}_2\text{MnO}_3$ . **(B)** Reactions were performed in the absence of  $\text{Li}_2\text{MnO}_3$ .

**(A)** With  $\text{Li}_2\text{MnO}_3$

| Wavelength<br>/nm | Light<br>intensity/W | Numbers of<br>irradiated<br>photon/s | Numbers of product molecule/s |             | Number of<br>used<br>photon/s | Apparent<br>quantum efficiency |
|-------------------|----------------------|--------------------------------------|-------------------------------|-------------|-------------------------------|--------------------------------|
|                   |                      |                                      | <b>2a</b>                     | <b>2a'</b>  |                               |                                |
| 320               | 0.0144               | 2.31674E+16                          | 2.34111E+16                   | 1.25417E+16 | 4.84944E+16                   | 2.093217231                    |
| 350               | 0.017                | 2.99145E+16                          | 5.10028E+16                   | 9.19722E+15 | 6.93972E+16                   | 2.31985                        |
| 365               | 0.0132               | 2.42232E+16                          | 4.18056E+16                   | 4.43139E+15 | 5.06683E+16                   | 2.091725093                    |
| 380               | 0.0166               | 3.17144E+16                          | 4.68222E+16                   | 8.36111E+15 | 6.35444E+16                   | 2.003644578                    |
| 410               | 0.0165               | 3.40121E+16                          | 4.515E+16                     | 7.525E+15   | 6.02E+16                      | 1.769960089                    |
| 425               | 0.0166               | 3.54701E+16                          | 4.26417E+16                   | 7.02333E+15 | 5.66883E+16                   | 1.598201205                    |
| 440               | 0.0177               | 3.91554E+16                          | 3.7625E+16                    | 1.00333E+16 | 5.76917E+16                   | 1.473404276                    |
| 470               | 0.0201               | 4.74962E+16                          | 4.18056E+16                   | 6.68889E+15 | 5.51833E+16                   | 1.161846618                    |
| 485               | 0.0162               | 3.95023E+16                          | 3.67889E+15                   | 0           | 3.67889E+15                   | 0.093131093                    |
| 500               | 0.0152               | 3.82102E+16                          | 3.42806E+16                   | 9.19722E+15 | 5.2675E+16                    | 1.378560197                    |
| 530               | 0.0119               | 3.17094E+16                          | 3.51167E+16                   | 2.2575E+15  | 3.96317E+16                   | 1.249839623                    |
| 545               | 0.00883              | 2.41948E+16                          | 1.505E+15                     | 0           | 1.505E+15                     | 0.062203393                    |
| 560               | 0.0081               | 2.28054E+16                          | 2.75917E+16                   | 5.51833E+15 | 3.86283E+16                   | 1.693821759                    |

**(B)** No catalyst

| Wavelength<br>/nm | Light<br>intensity/W | Numbers of<br>irradiated<br>photon/s | Numbers of product molecule/s |             | Number of<br>used<br>photon/s | Apparent<br>quantum efficiency |
|-------------------|----------------------|--------------------------------------|-------------------------------|-------------|-------------------------------|--------------------------------|
|                   |                      |                                      | <b>2a</b>                     | <b>2a'</b>  |                               |                                |
| 320               | 0.00989              | 1.59E + 16                           | 0.50E + 15                    | 0.04 E + 15 | 0.06E + 16                    | 0.363                          |
| 350               | 0.01387              | 2.44 E + 16                          | 4.37 E + 15                   | 1.00 E + 15 | 0.64 E + 16                   | 0.261                          |
| 380               | 0.01464              | 2.80 E + 16                          | 7.77 E + 15                   | 1.60 E + 15 | 1.10 E + 16                   | 0.392                          |
| 440               | 0.01532              | 3.39 E + 16                          | 8.06 E + 15                   | 1.59 E + 15 | 1.12 E + 16                   | 0.331                          |
| 500               | 0.01473              | 3.70 E + 16                          | 8.38 E + 15                   | 1.67 E + 15 | 1.17 E + 16                   | 0.316                          |
| 560               | 0.01066              | 3.00E + 19                           | 5.48 E + 15                   | 1.29 E + 15 | 0.81 E + 16                   | 0.269                          |

## References and Notes

- S1 T. M. Shaikh, A. Sudalai, *Tetrahedron Lett.* **46**, 5587 (2005).
- S2 R. Montoro, T. Wirth, *Synthesis* **9**, 1473 (2005).
- S3 I. S. Akhrem, A. V. Orlinkov, L. V. Afanas'eva, E. I. Mysov, M. E. Vol'pin,  
*Tetrahedron Lett.* **36**, 9365 (1995).
- S4 X. Jiang, M. Shen, Y. Tang, C. Li, *Tetrahedron Lett.* **46**, 487 (2005).

C:\WIN\Lambdambda\DATA\森田\Bromocyclohexane  
122 Bromocyclohexane  
DATIM Wed Feb 09 17:21:36 2011

OBNUC 1H non  
EXMOD  
OBSRO 399.65 MHz  
OBSSET 0.00 KHz  
OBFIN 134840.56 Hz  
POINT 16384  
FREQU 4911.59 Hz  
SCANS 12  
ACQTM 3.3358 sec  
PD 0.3284 sec  
PWI 5.40 usec  
IRNUC 1H 22.7 c  
CTEMP CDCL3  
SLVNT 7.24 ppm  
EXREF 0.10 Hz  
BF 10  
RGAIN

DFILE  
COMNT  
DATIM  
OBNUC  
EXMOD  
OBSRO  
OBSSET  
OBFIN  
POINT  
FREQU  
SCANS  
ACQTM  
PD  
PWI  
IRNUC  
CTEMP  
SLVNT  
EXREF  
BF  
RGAIN

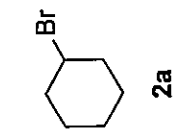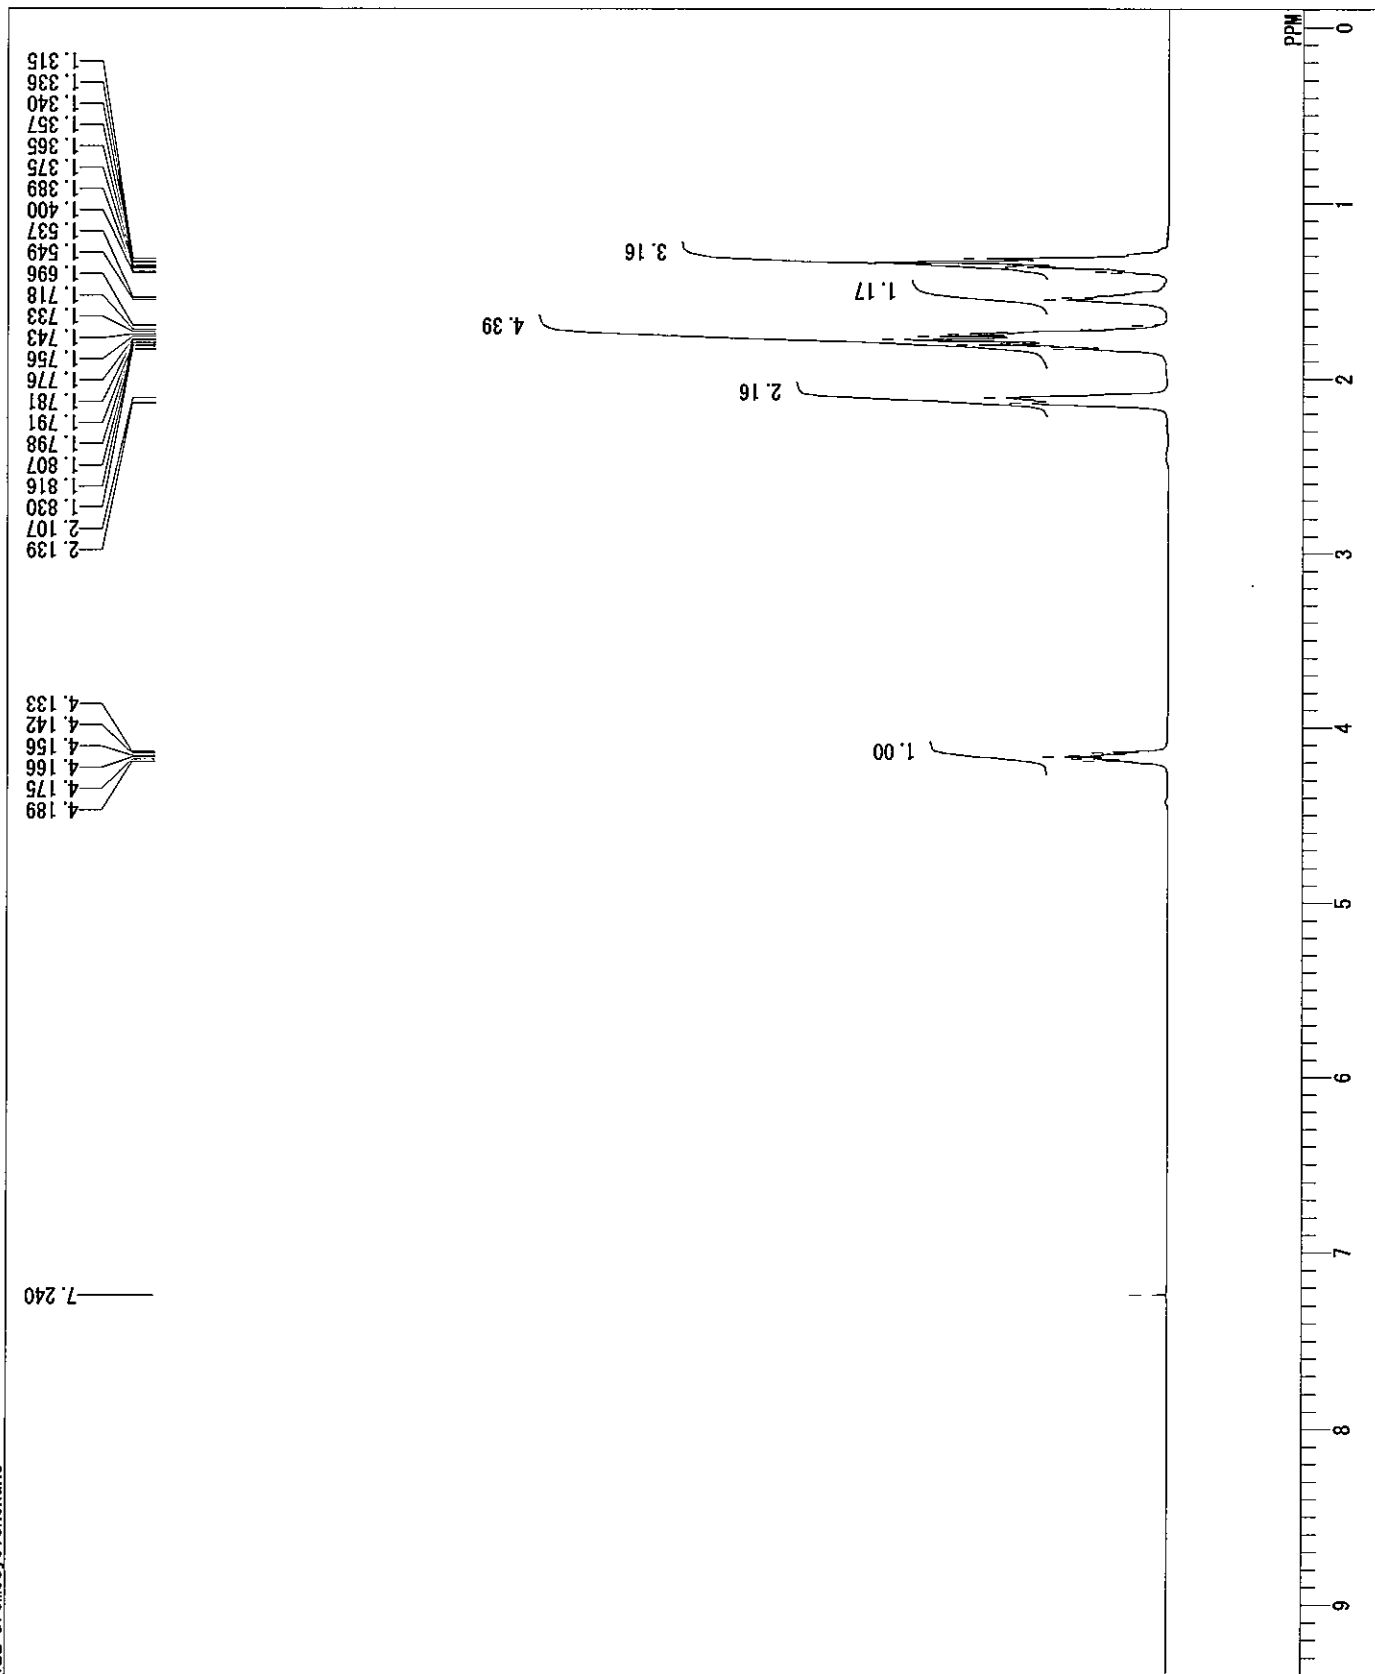

122 Bromocyclohexane

C:\WIN\amba\DATA\森田\Bromocyclohexane  
122 Bromocyclohexane  
Wed Feb 09 17:27:41 2011  
13C  
bom

EXMOD 100.40 MHz  
OBSFRQ 0.00 KHz  
OBSSET 135147.69 Hz  
OBFIN 32768  
POINT 59880.24 Hz  
SCANS 128  
ACQTM 0.5472 sec  
PD 1.3620 sec  
PWI 4.50 usec  
IRNUC 1H  
CTEMP 23.0 c  
SLVNT CDCL3  
EXREF 77.00 ppm  
BF 0.10 Hz  
RGAIN 24

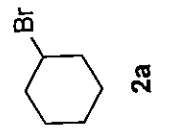

122\_Bromocyclohexane

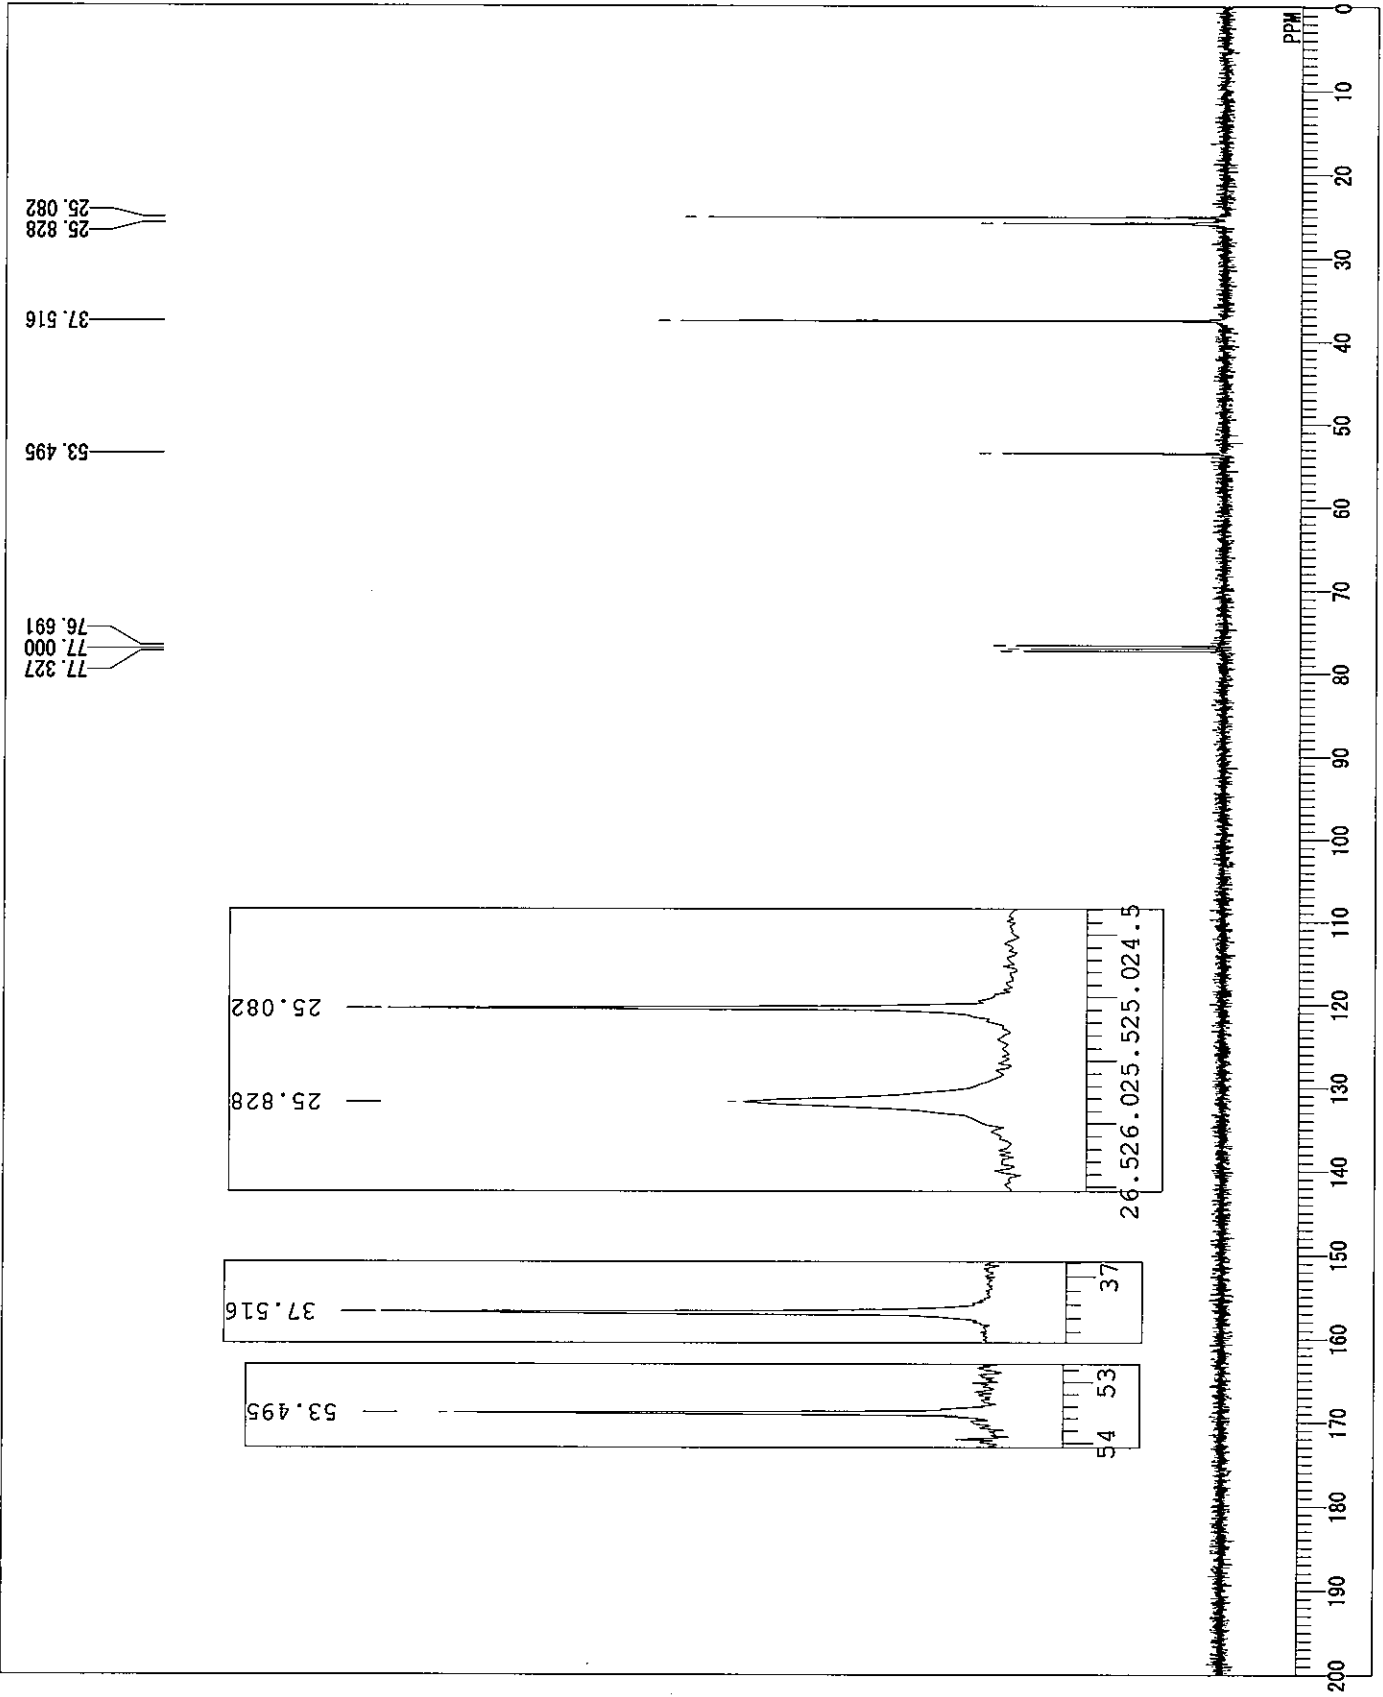

122 Benzylbromide

DFILE C:\WIN\Lambdambda\DATA\森田\Bromobenzylbromide  
COMNT 122 Benzylbromide  
DATIM Wed Feb 16 17:24:50 2011  
OBNUC 1H  
EXMOD non  
OBFRQ 399.65 MHz  
OBSET 0.00 KHz  
OBFIN 134840.58 Hz  
POINT 16384  
FREQU 4911.59 Hz  
SCANS 12  
ACQTM 3.3358 sec  
PD 0.3284 sec  
PW1 5.40 usec  
IRNUC 1H  
CTEMP 22.7 c  
SLVNT CDCl3  
EXREF 7.24 ppm  
BF 0.12 Hz  
RGAIN 6

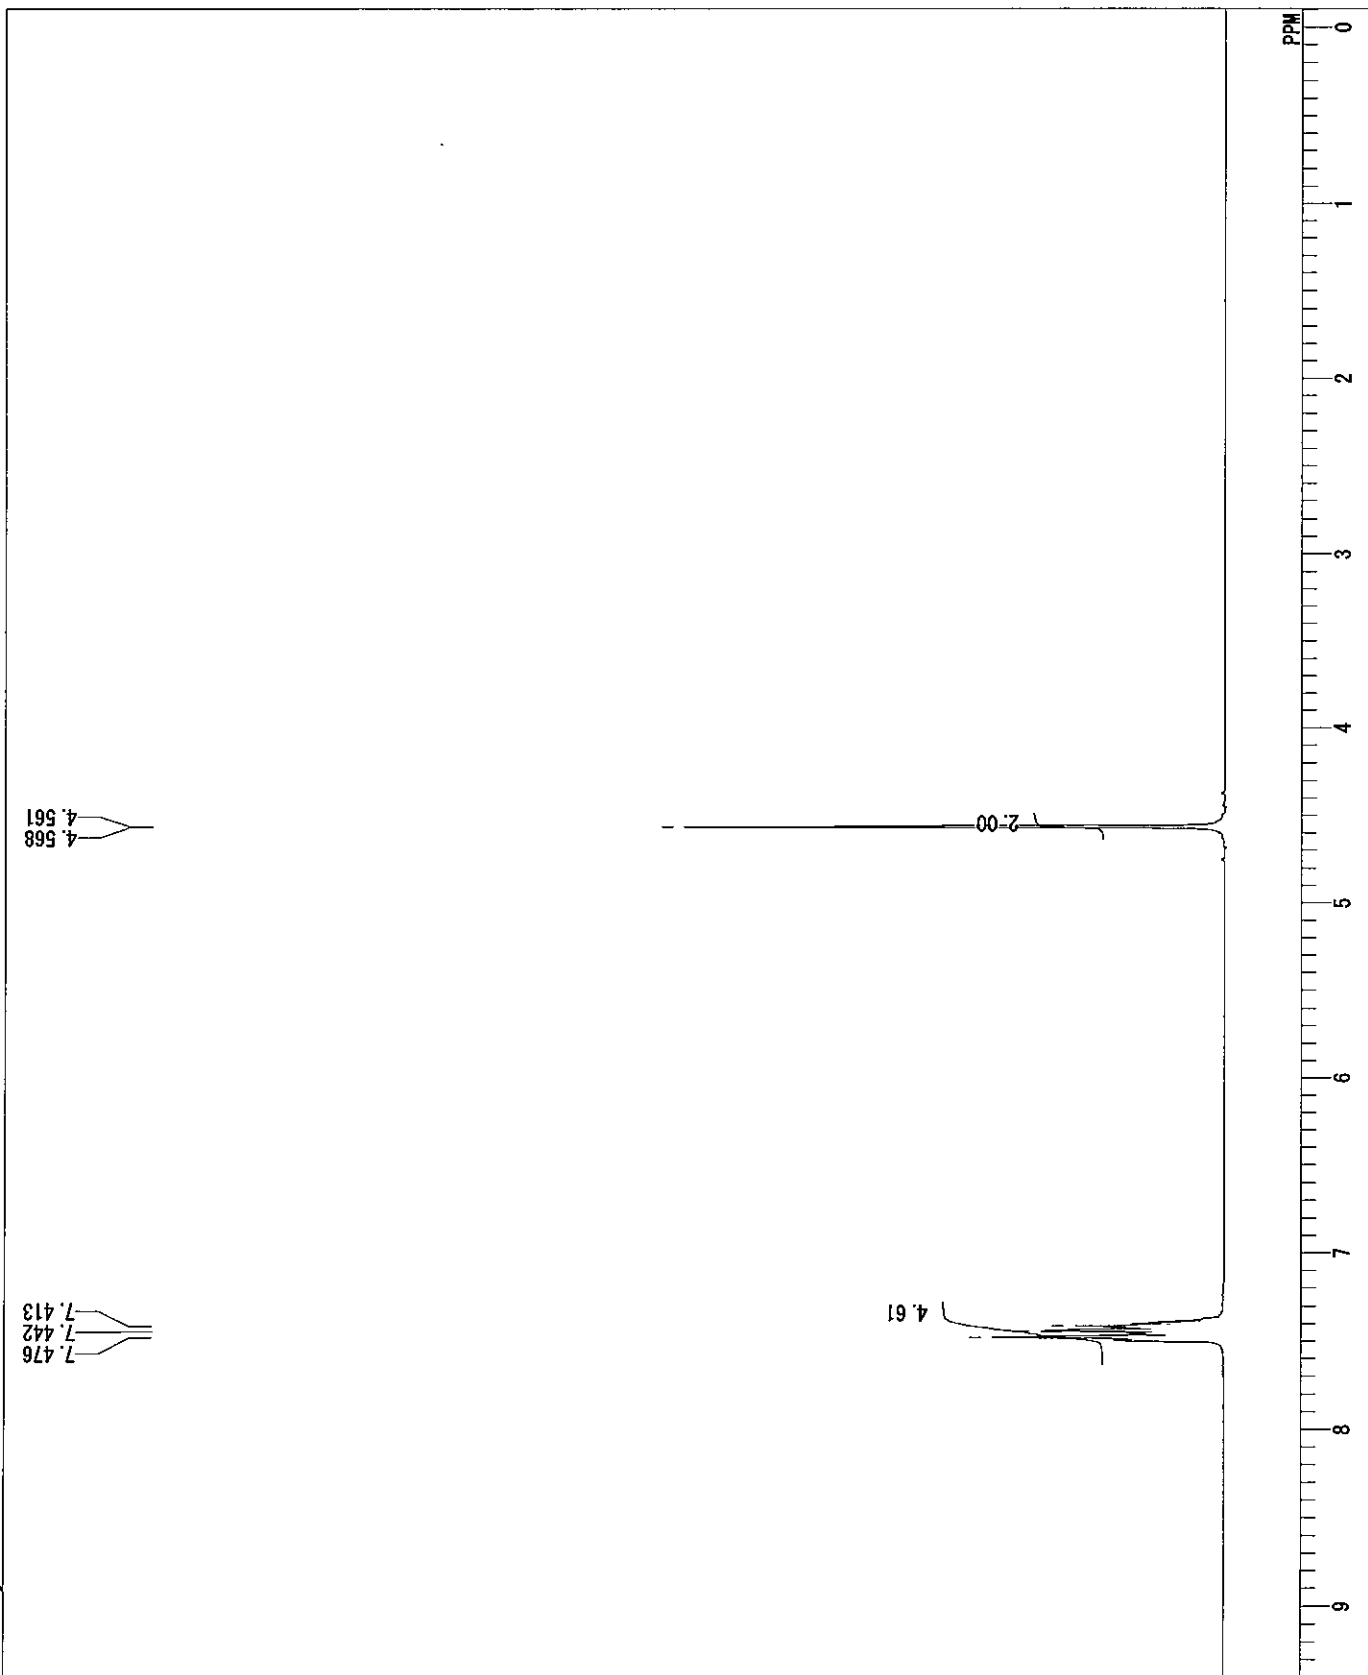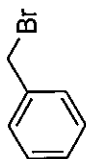

2b

122\_BenzyIbromide

DFILE C:\WIN\Lambdambdaa\DATA\森田\BromoIbromide  
COMNT 122\_BenzyIbromide  
DATIM Wed Feb 16 17:28:29 2011  
OBNUC 13C  
EXMOD bcm  
OBFREQ 100.40 MHz  
OBSET 0.00 KHz  
OBFIN 135147.69 Hz  
POINT 32768  
FREQD 59880.24 Hz  
SCANS 83  
ACQTM 0.5472 sec  
PD 1.3620 sec  
PW1 4.50 usec  
IRNUC 1H  
GTEMP 23.0 c  
SLYNT CDCL3  
EXREF 77.00 ppm  
BF 0.12 Hz  
RGAIN 22

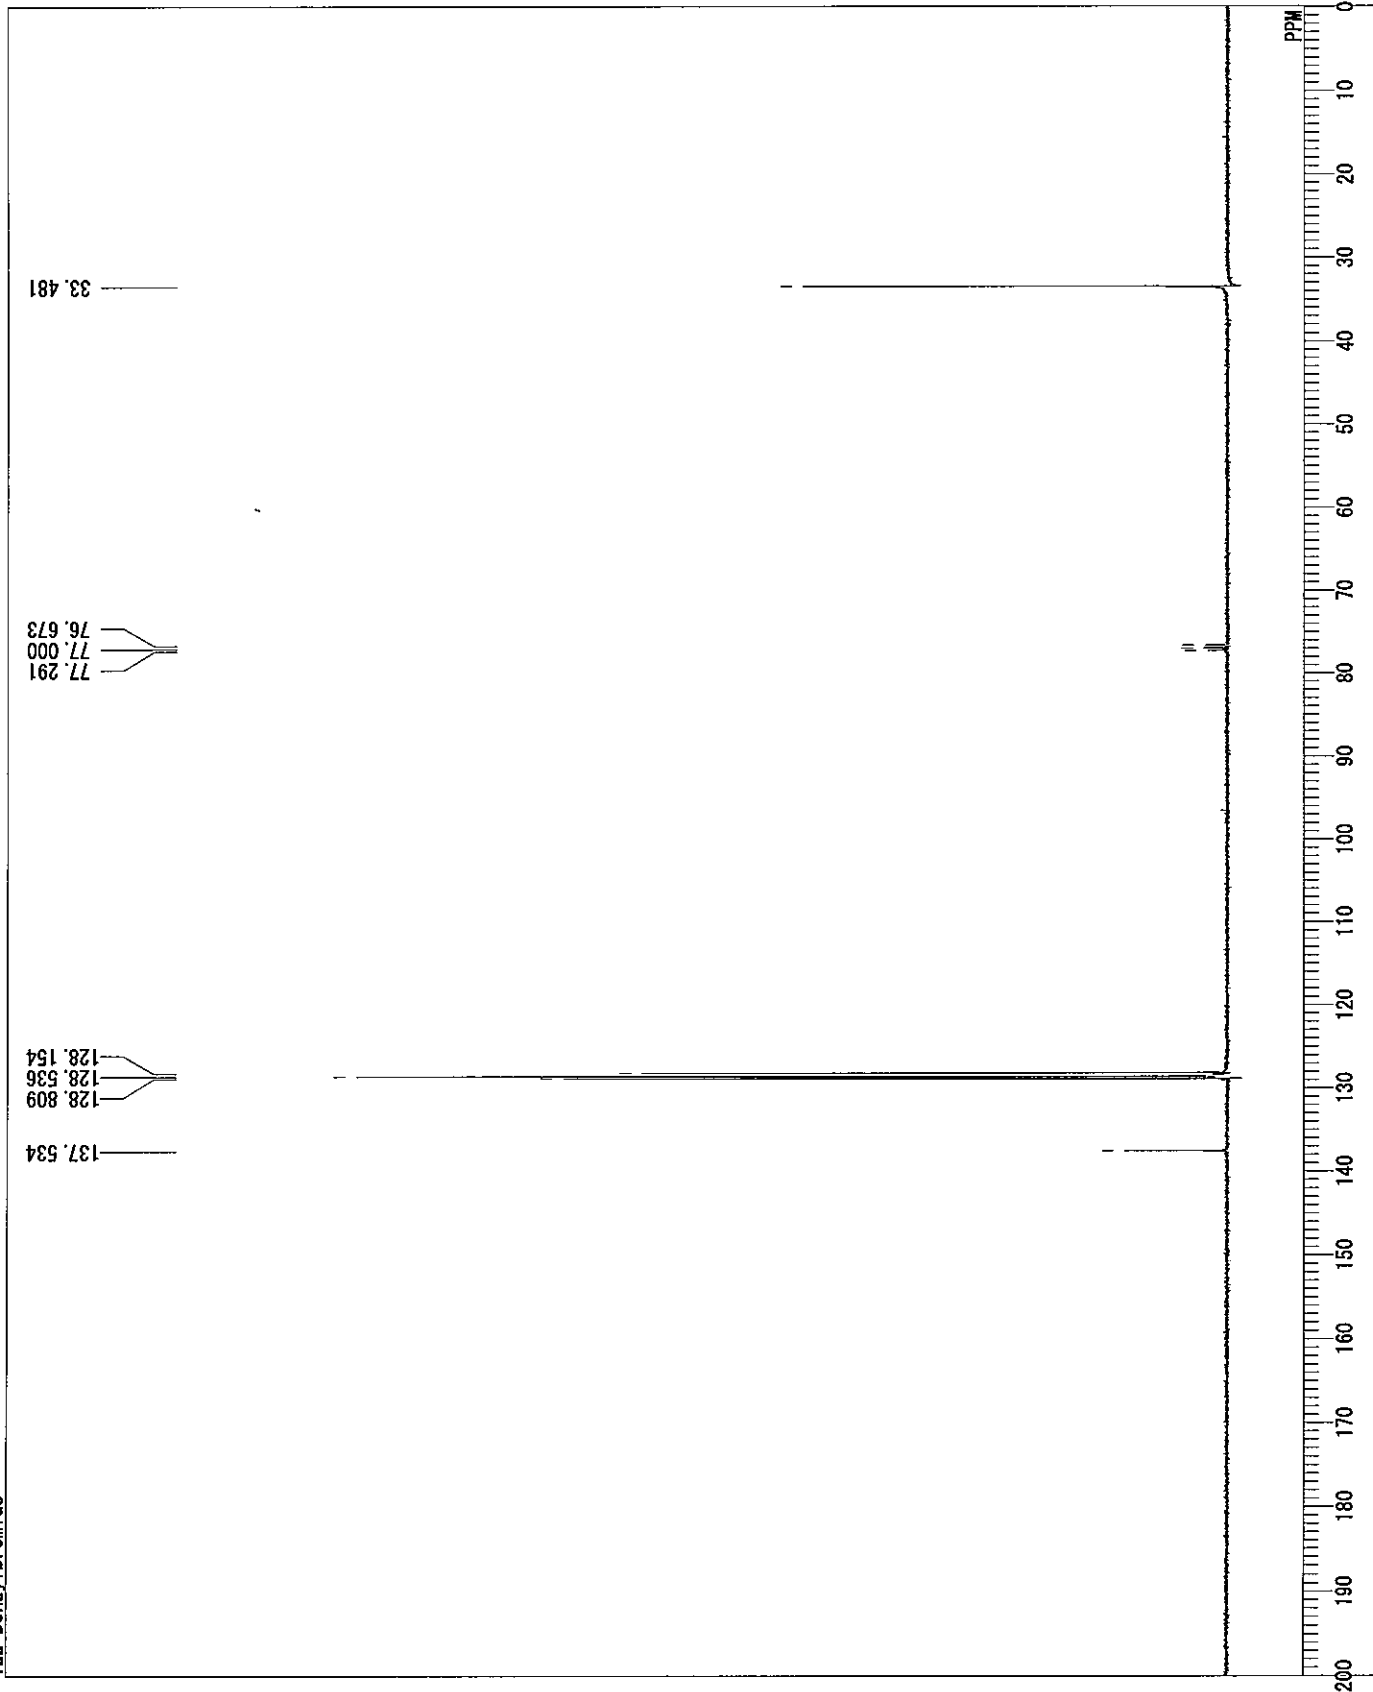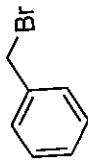

2b

122 Bromobenzene

DFILE C:\WIN\lambda\data\122 Bromobenzene  
COMNT 122 Bromobenzene  
DATIM Wed Feb 16 17:34:15 2011  
OBNUC 1H  
EXMOD non  
OBFRQ 399.65 MHz  
OBSET 0.00 KHz  
OBFIN 134840.58 Hz  
POINT 16384  
FREQU 4911.59 Hz  
SCANS 12  
ACQTM 3.3358 sec  
PD 0.3284 sec  
PW1 5.40 usec  
IRNUC 1H  
GTEMP 22.4 c  
SLVNT CDCl3  
EXREF 7.24 ppm  
BF 0.12 Hz  
RGAIN 9

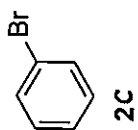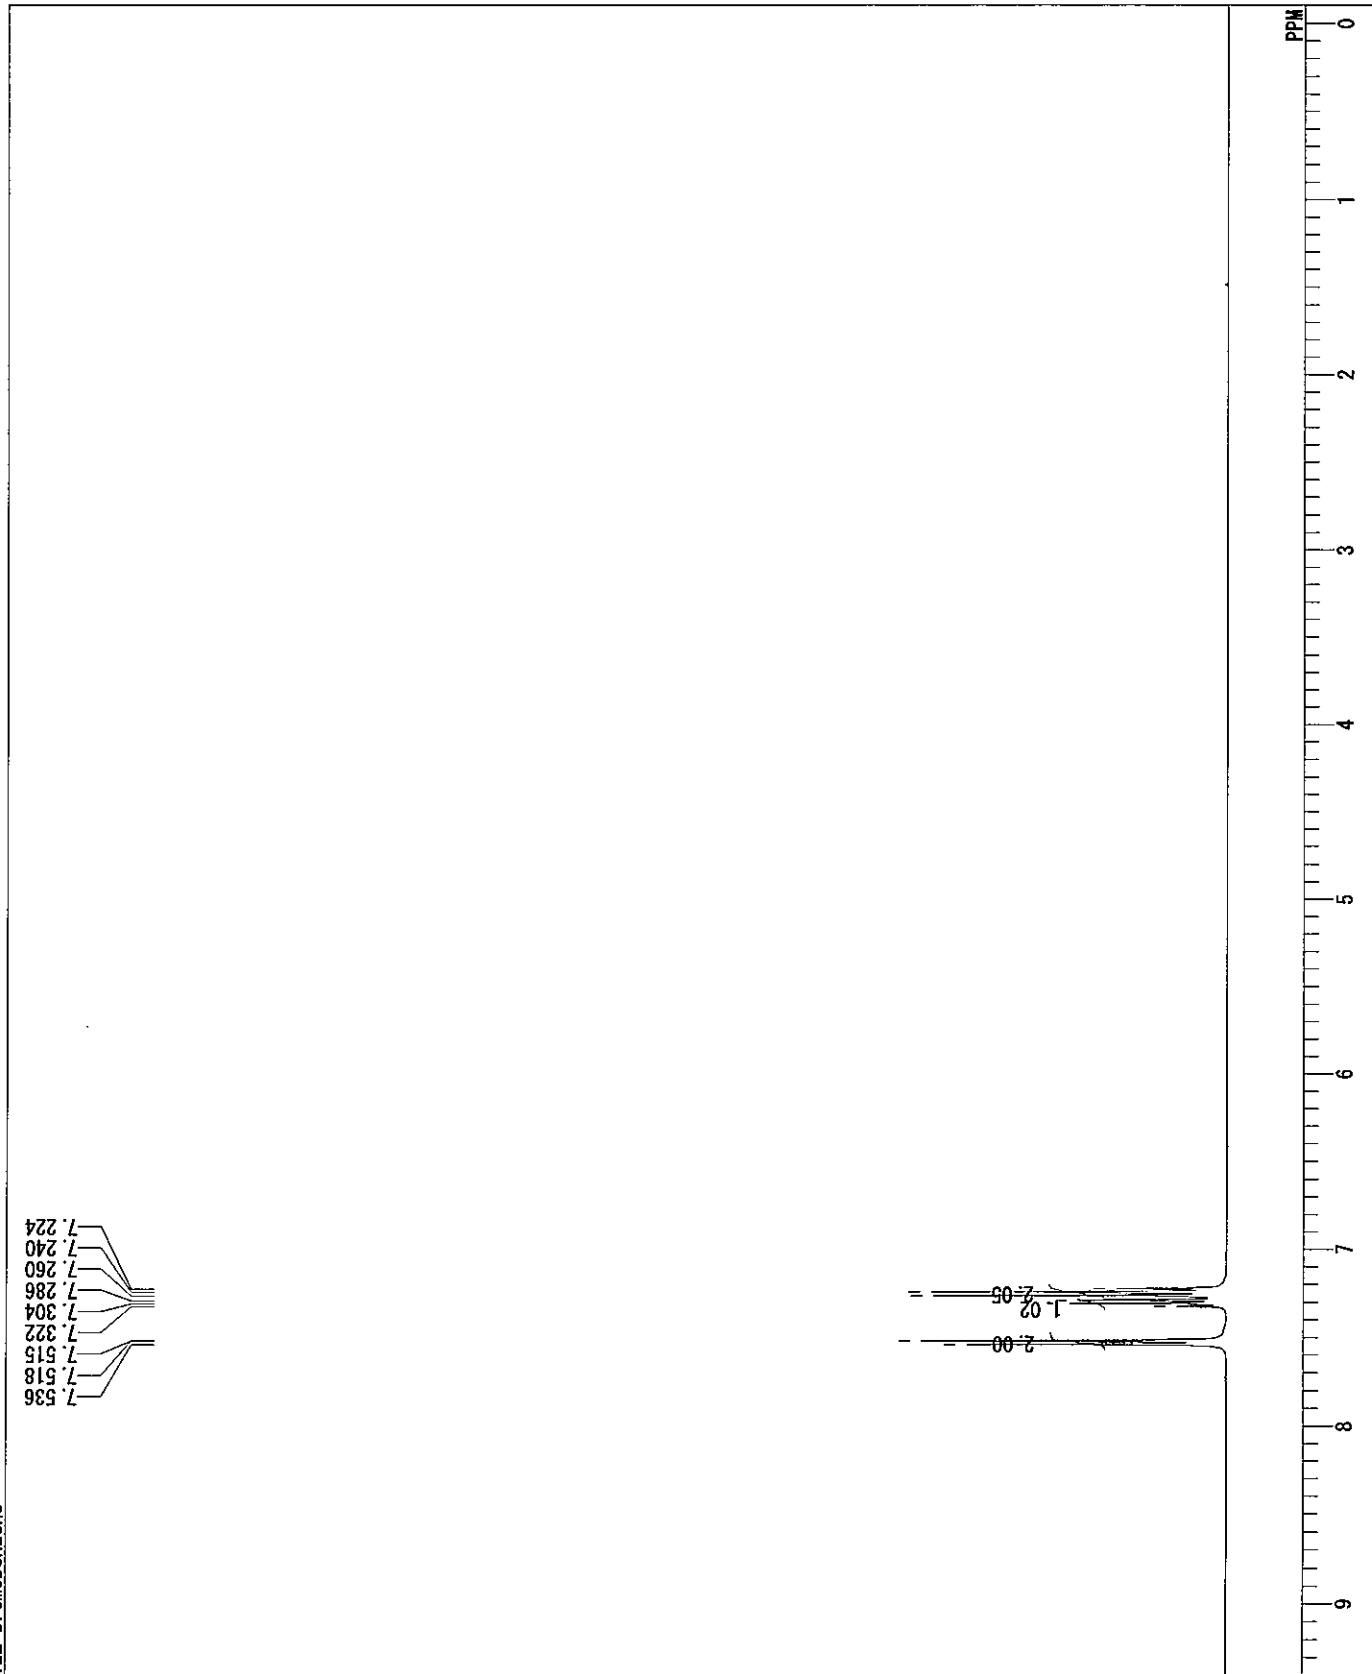



C:\Wiri\Lambdambda\DATA\森田\Bromobenzene  
122 Bromobenzene  
Wed Feb 16 17:39:39 2011

OBNUC 13C  
EXMOD bcm  
OBFREQ 100.40 MHz  
OBSET 0.00 KHz  
OBFIN 135147.69 Hz  
POINT 32768  
FREQU 59880.24 Hz  
SCANS 130  
AQTM 0.5472 sec  
PD 1.3620 sec  
PW1 4.50 usec  
IRNUC 1H  
CTEMP 22.9 c  
SLVNT CDCl3  
EXREF 77.00 ppm  
BF 0.12 Hz  
RGAIN 23

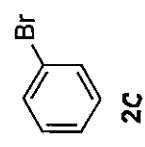

122 Bromobenzene

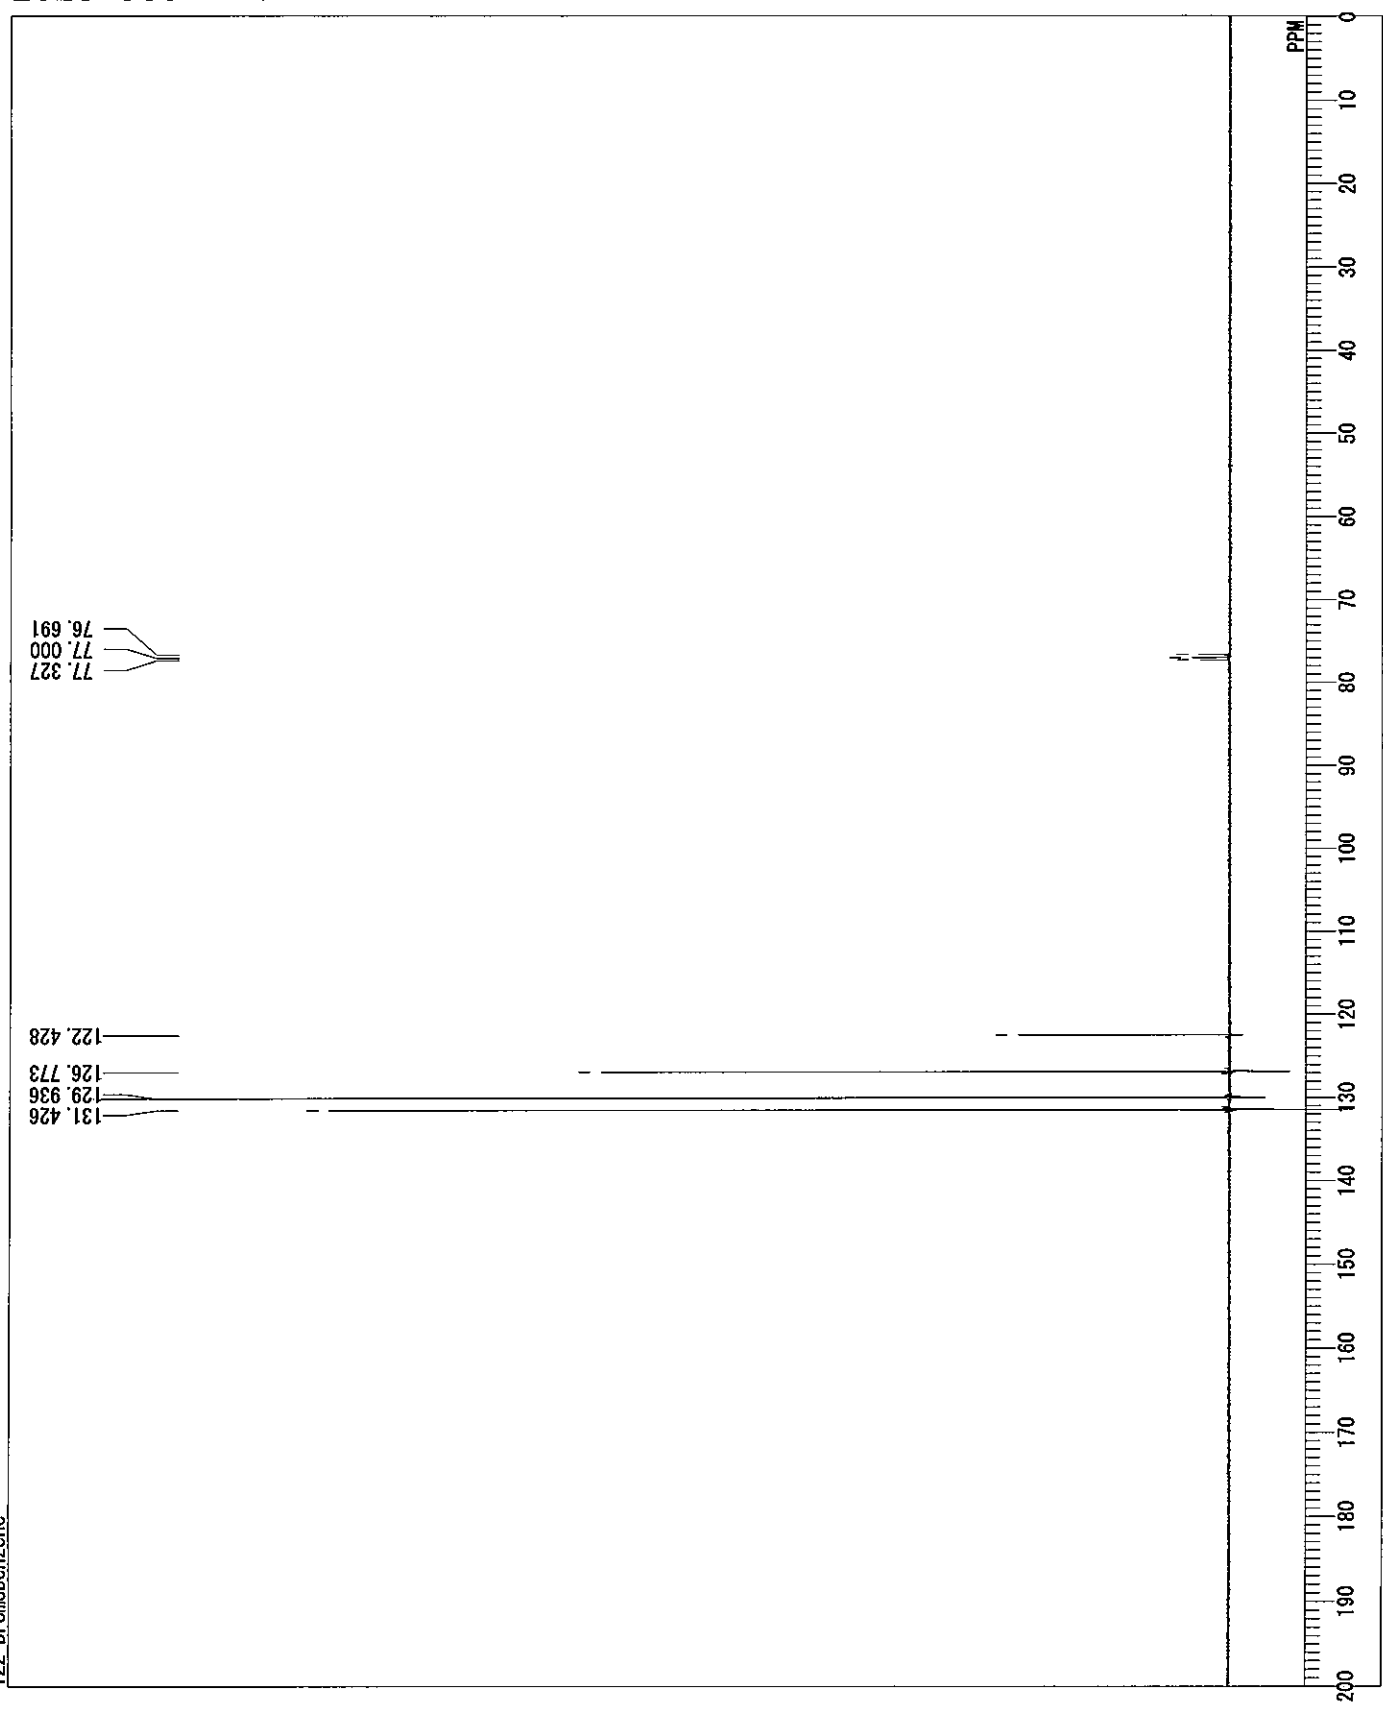

122 Bromocyclooctane

DFILE C:\WInLambday\DATA\#122\122 Bromocyclooctane  
COMNT 122 Bromocyclooctane  
DATIM Sat Feb 26 08:31:38 2011  
OBNUC 1H  
EXMOD non  
OBFRQ 399.65 MHz  
OBSET 0.00 KHz  
OBFIN 134840.58 Hz  
POINT 16384  
FREQU 4911.59 Hz  
SCANS 8  
ACQTM 3.358 sec  
PD 0.3284 sec  
PW1 5.40 usec  
IRNUC 1H  
CTEMP 23.0 c  
SLVNT CDCl3  
EXREF 7.24 ppm  
BF 0.15 Hz  
RGAIN 11

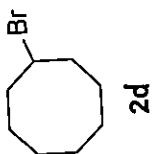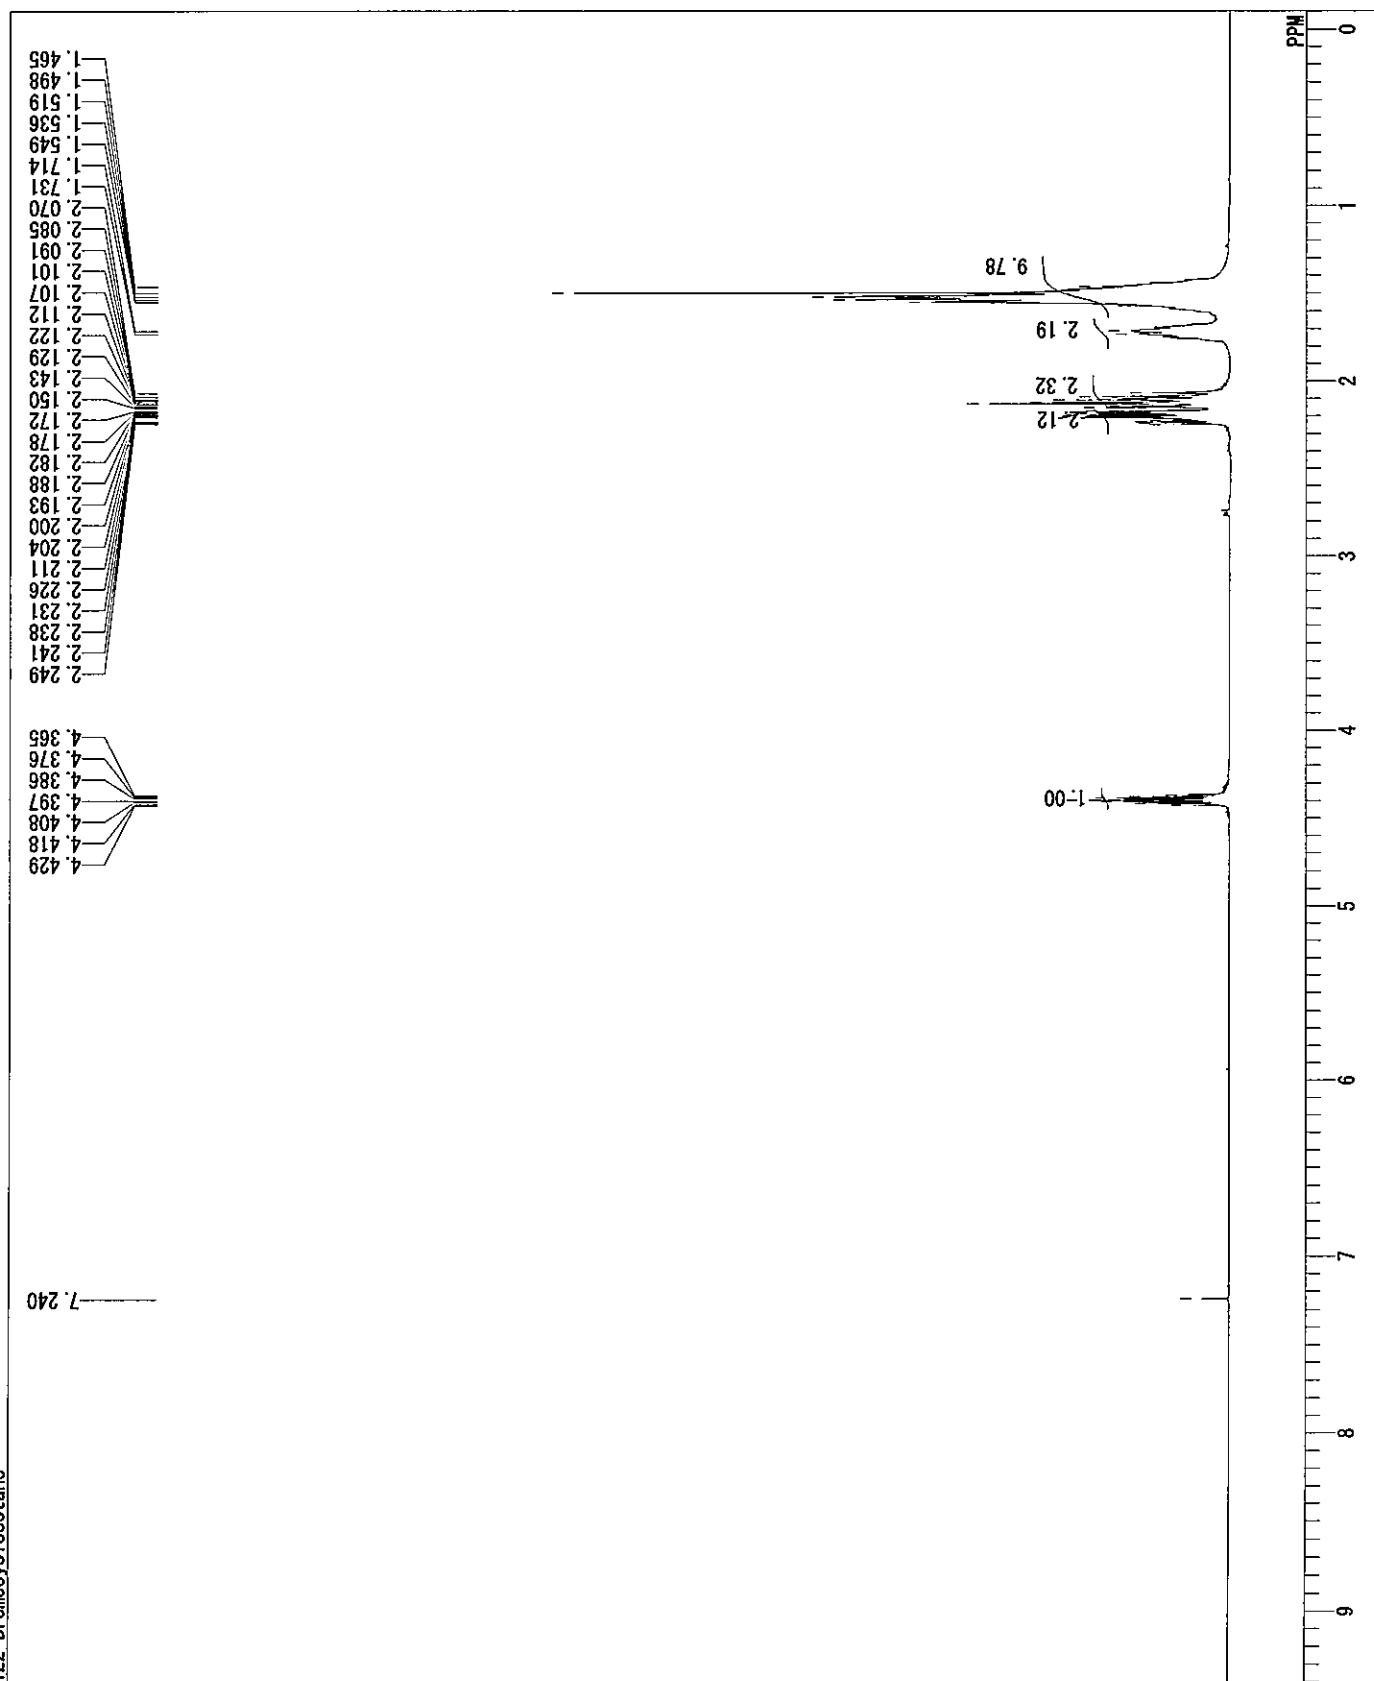

122\_Bromocyclooctane

DFILE C:\WJ\InLambda\DATA\森田\#bromocyclooctane  
COMNT 122 Bromocyclooctane  
DATIM Sat Feb 26 08:40:02 2011  
OBNUC 13C  
EXMOD bcm  
OBFRQ 100.40 MHz  
OBSET 0.00 KHz  
OBFIN 135147.69 Hz  
POINT 32768  
FREQU 59880.24 Hz  
SCANS 226  
ACQTM 0.5472 sec  
PD 1.3620 sec  
PWI 4.50 usec  
IRNUC 1H  
CTEMP 23.2 c  
SLVNT CDCL3  
EXREF 77.00 ppm  
BF 0.12 Hz  
RGAIN 24

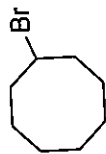

2d

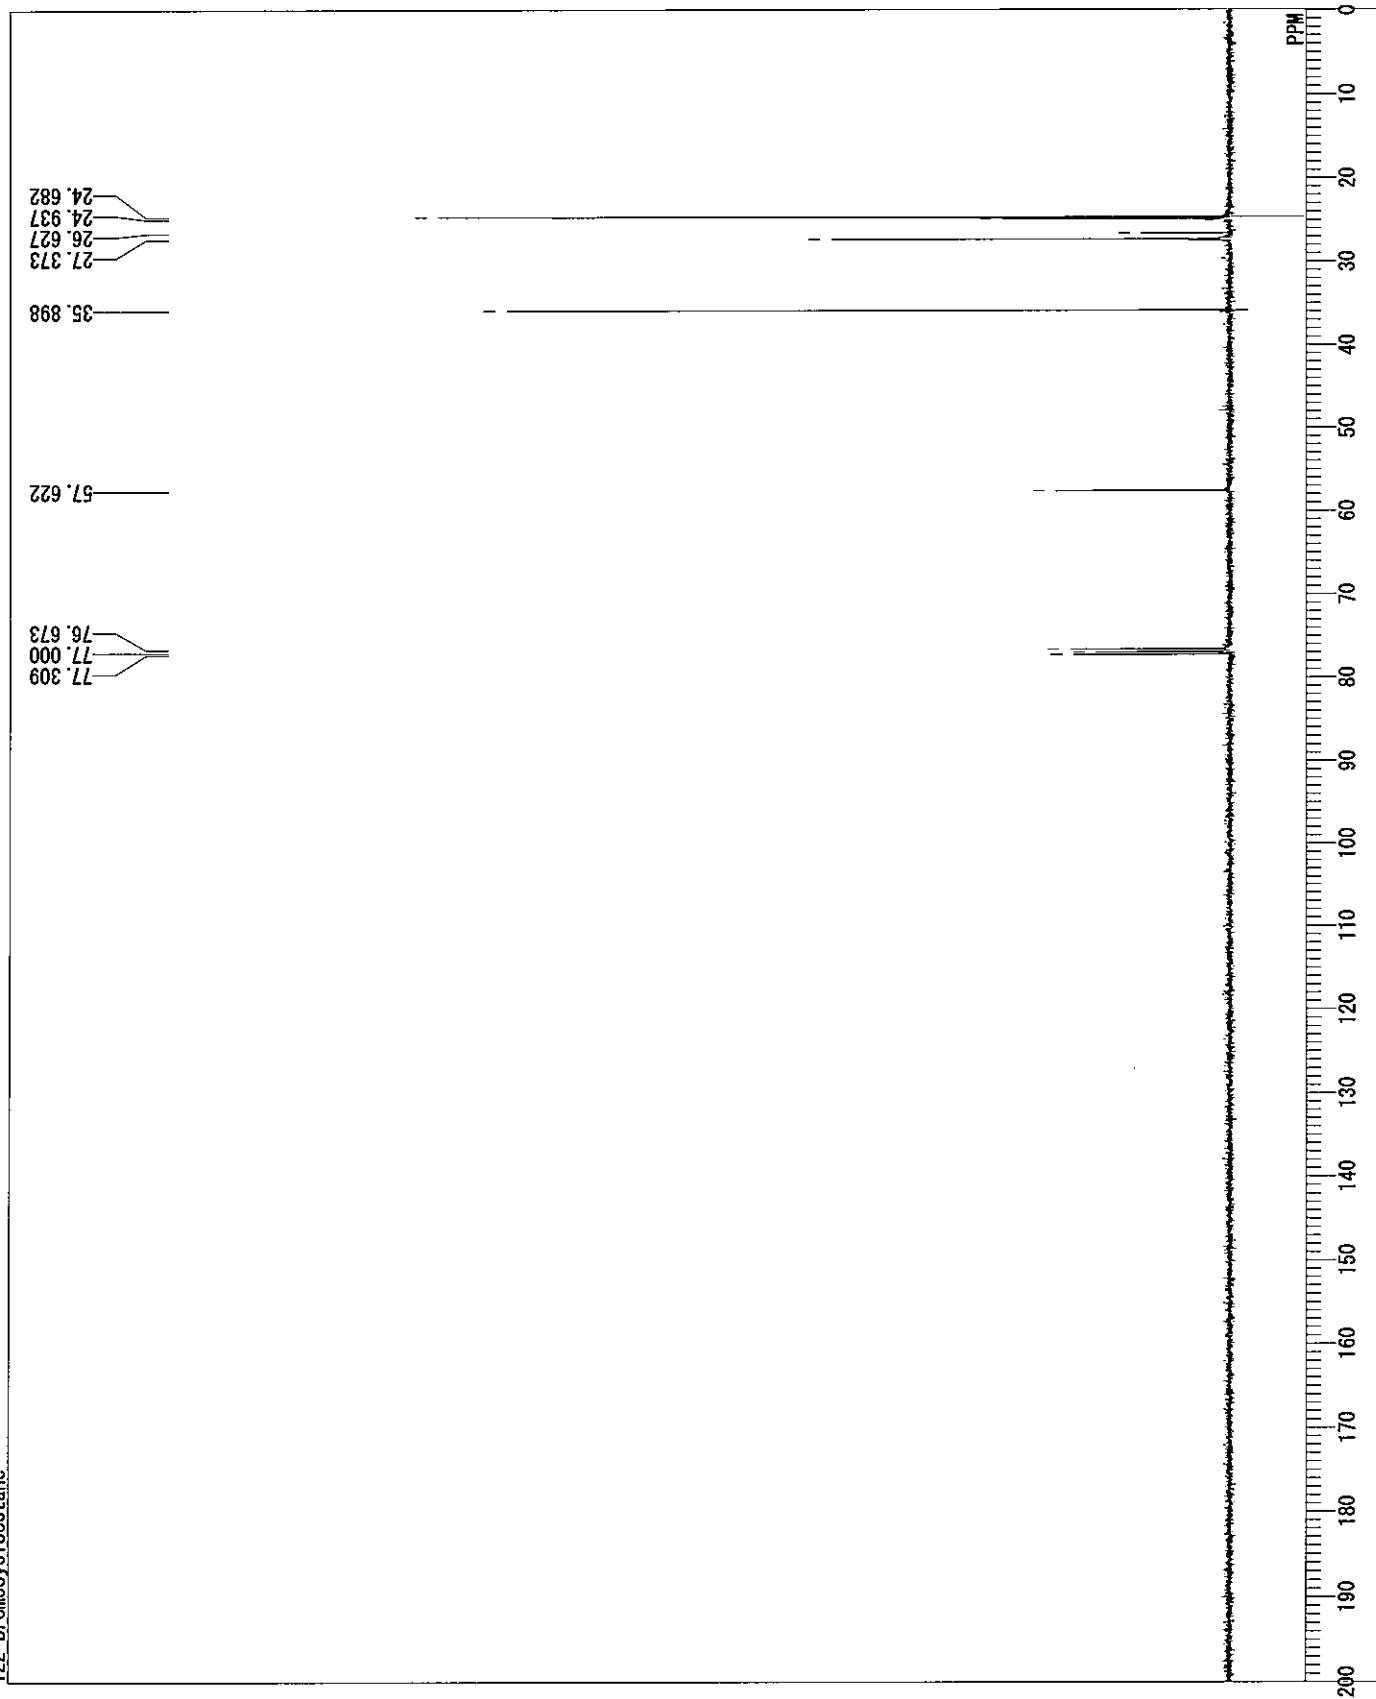

2010-11-16-3

DFILE C:\WinLambda\DATA\仁科\2010\4201  
 CONNT 2010-11-16-3  
 DATIM Tue Nov 16 15:21:18 2010  
 OBNUG 1H  
 EXMOD non  
 OBERQ 399.65 MHz  
 OBSET 0.00 KHz  
 OBF IN 134840.58 Hz  
 POINT 16384  
 FREOU 4911.59 Hz  
 SCANS 8  
 ACQTH 3.358 sec  
 PD 0.3284 sec  
 PW1 5.40 usec  
 IRNUC 1H  
 CTEMP 23.4 c  
 SLYNT CDCL3  
 EXREF 5.93 ppm  
 BF 0.07 Hz  
 RGAIN 11

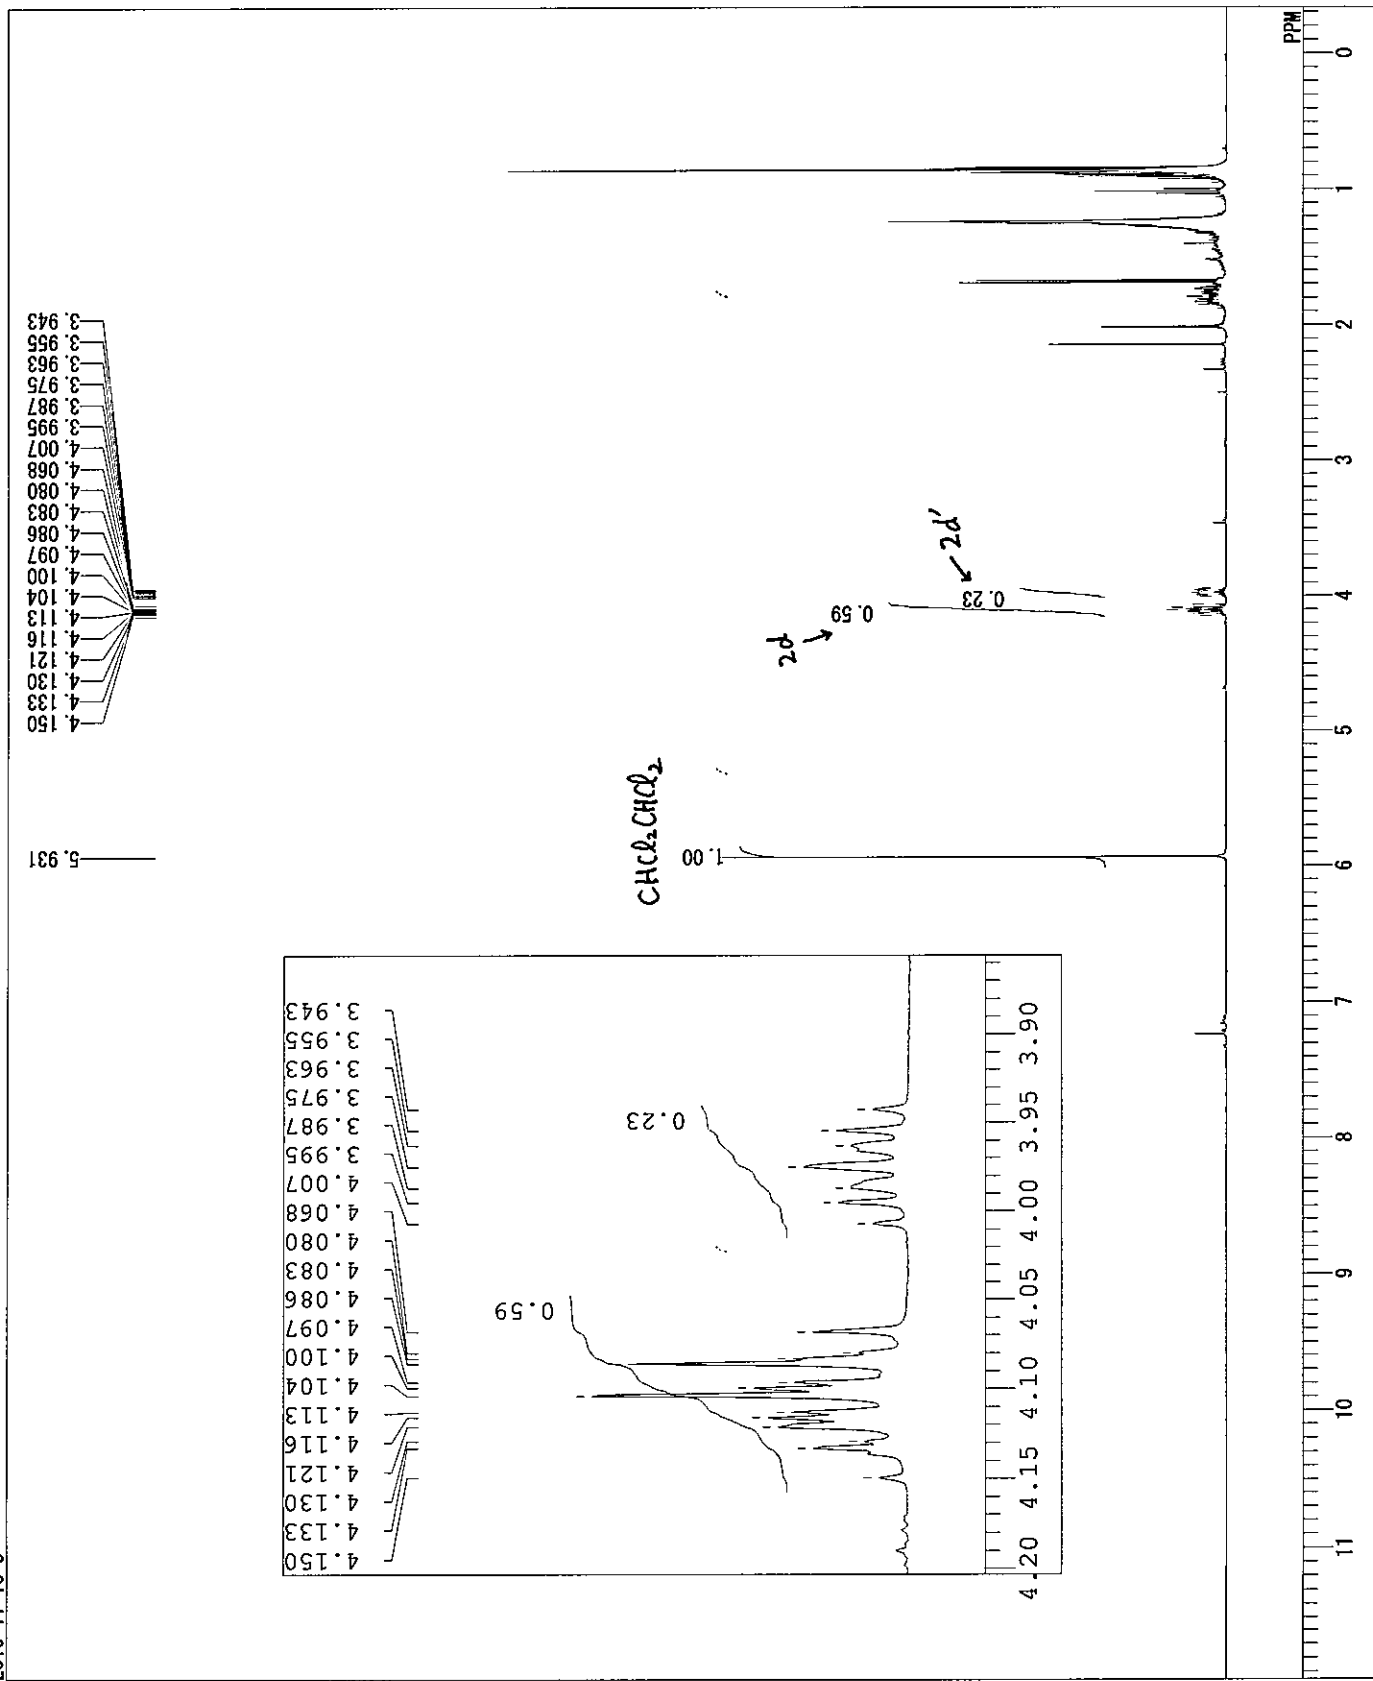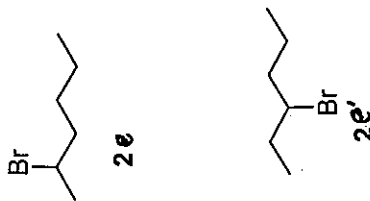

122\_1-Bromoadamantane

DF:FILE  
COMINT  
DATIM  
OBNUG  
EXMOD  
OBFRO  
OBSET  
OBFIN  
POINT  
FREQU  
SCANS  
ACQTM  
PD  
PW1  
IRNUC  
CTEMP  
SLVNT  
EXREF  
BF  
RGAIN

C:\WinLambda\DATA\森田\Bromo  
122\_1-Bromoadamantane  
Thu Feb 17 09:29:27 2011  
1H  
non  
399.65 MHz  
0.00 KHz  
134840.58 Hz  
16384  
4911.59 Hz  
12  
3.3358 sec  
0.3284 sec  
5.40 usec  
1H  
22.6 C  
CDCL3  
7.24 ppm  
0.12 Hz  
12

1.698  
1.705  
1.713  
2.080  
2.338  
2.346

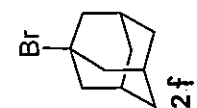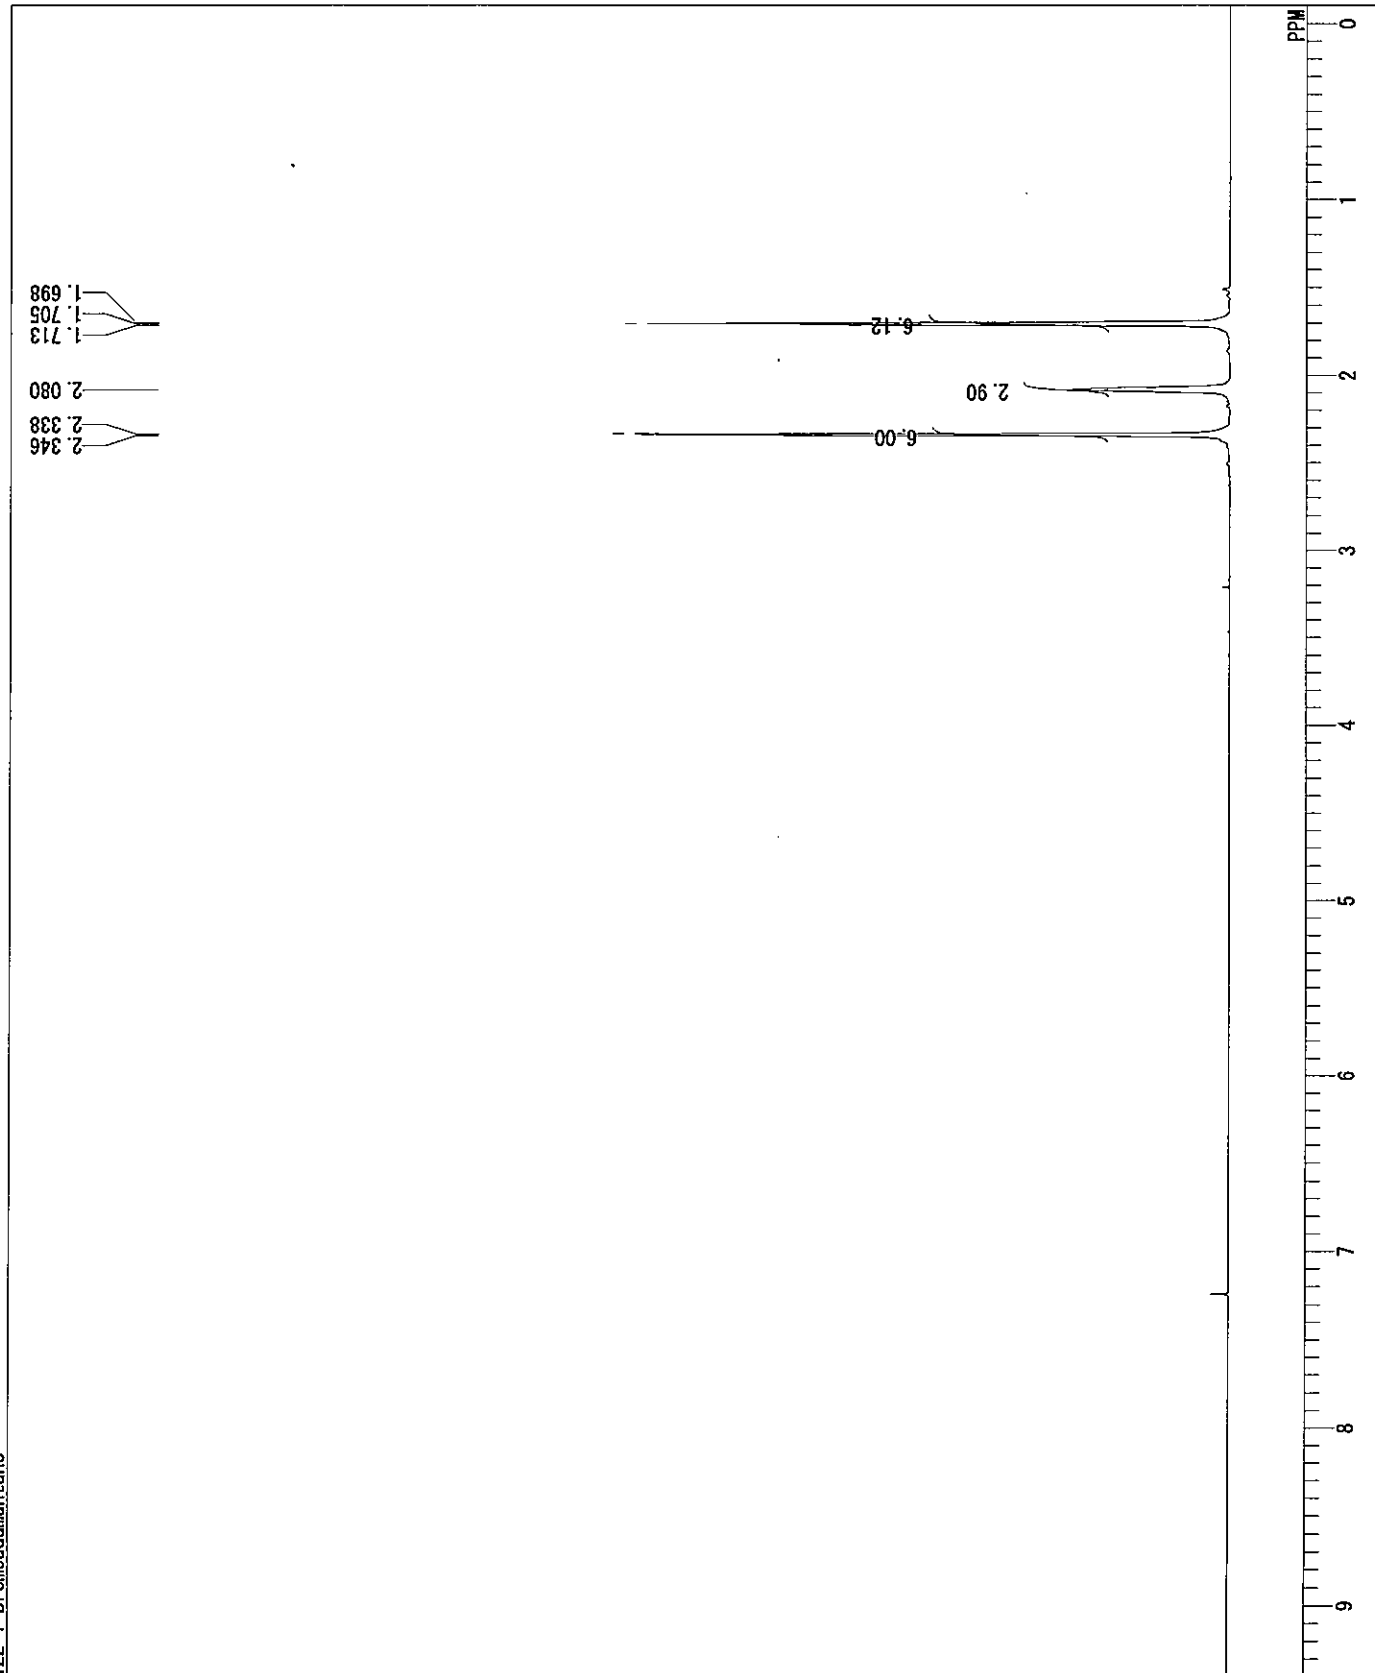

122\_1-Bromoadamantane

C:\WIN\lambdambda\DATA\森田\122\_1-bromoadamantane  
122\_1-Bromoadamantane  
Thu Feb 17 09:37:47 2011  
13C  
bcm  
EXMOD  
OBFRQ 100.40 MHz  
OBSET 0.00 KHz  
OBFIN 135147.69 Hz  
POINT 32768  
FREQU 59880.24 Hz  
SCANS 218  
ACQTM 0.5472 sec  
PD 1.3620 sec  
PWI 4.50 usec  
IRNUC 1H  
CTEMP 23.0 c  
SLVNT CDCL3  
EXREF 77.00 ppm  
BF 0.12 Hz  
RGAIN 24

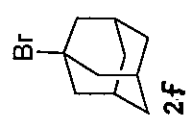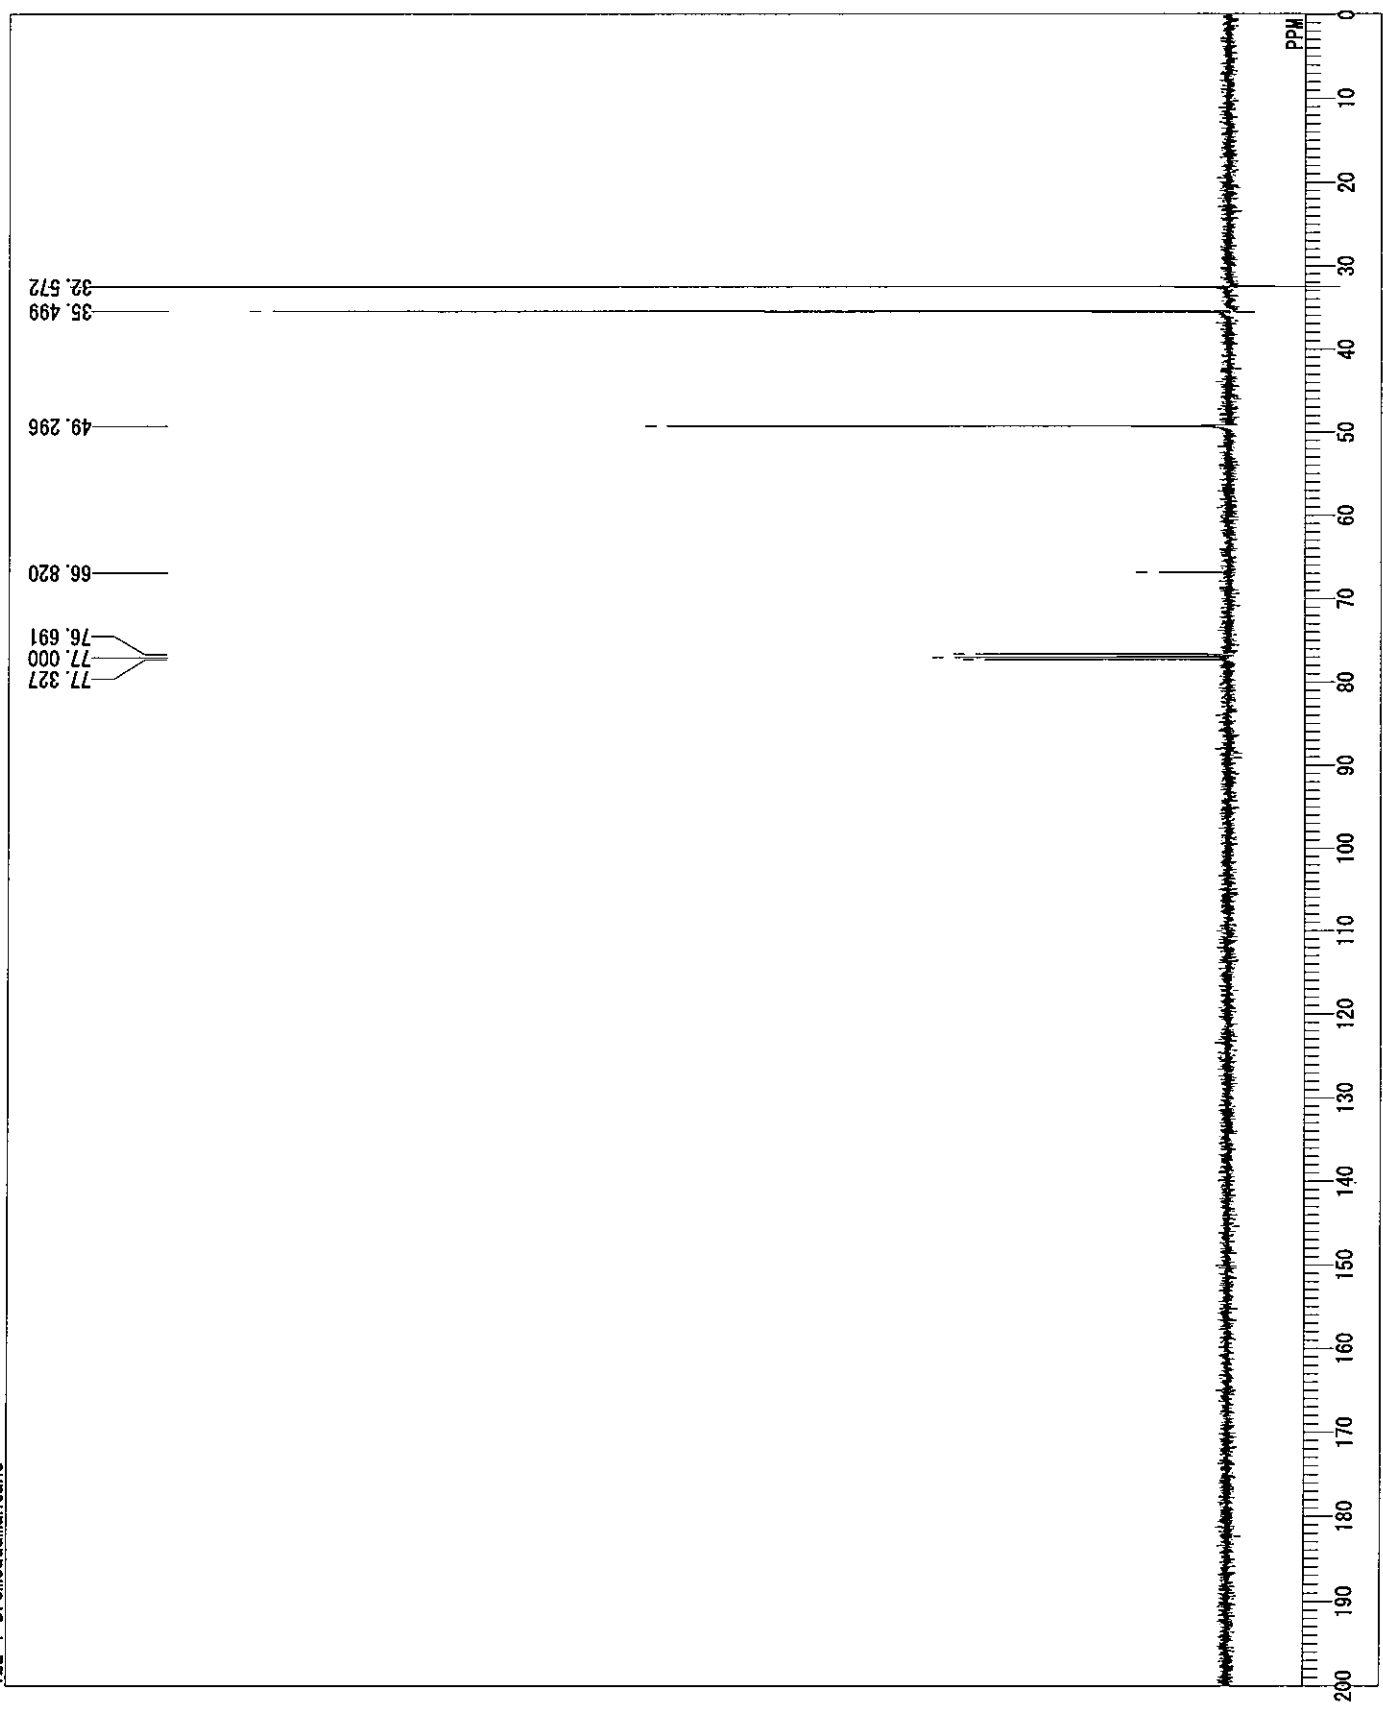

122\_2-Bromoadamantane

DFILE C:\WIN\lambda\da\DATA\森田\122\_2-bromo\122\_2  
COMNT 122\_2-Bromoadamantane  
DATIM Thu Feb 17 09:42:02 2011  
OBNUC 1H  
EXMOD non  
OBFRQ 399.65 MHz  
OBSET 0.00 KHz  
OBFIN 134840.58 Hz  
POINT 16384  
FREQU 49111.59 Hz  
SCANS 8  
ACQTM 3.3358 sec  
PD 0.3284 sec  
PW1 5.40 usec  
IRNUC 1H  
CTEMP 22.8 c  
SLVNT CDCl3  
EXREF 7.24 ppm  
BF 0.12 Hz  
RGAIN 12

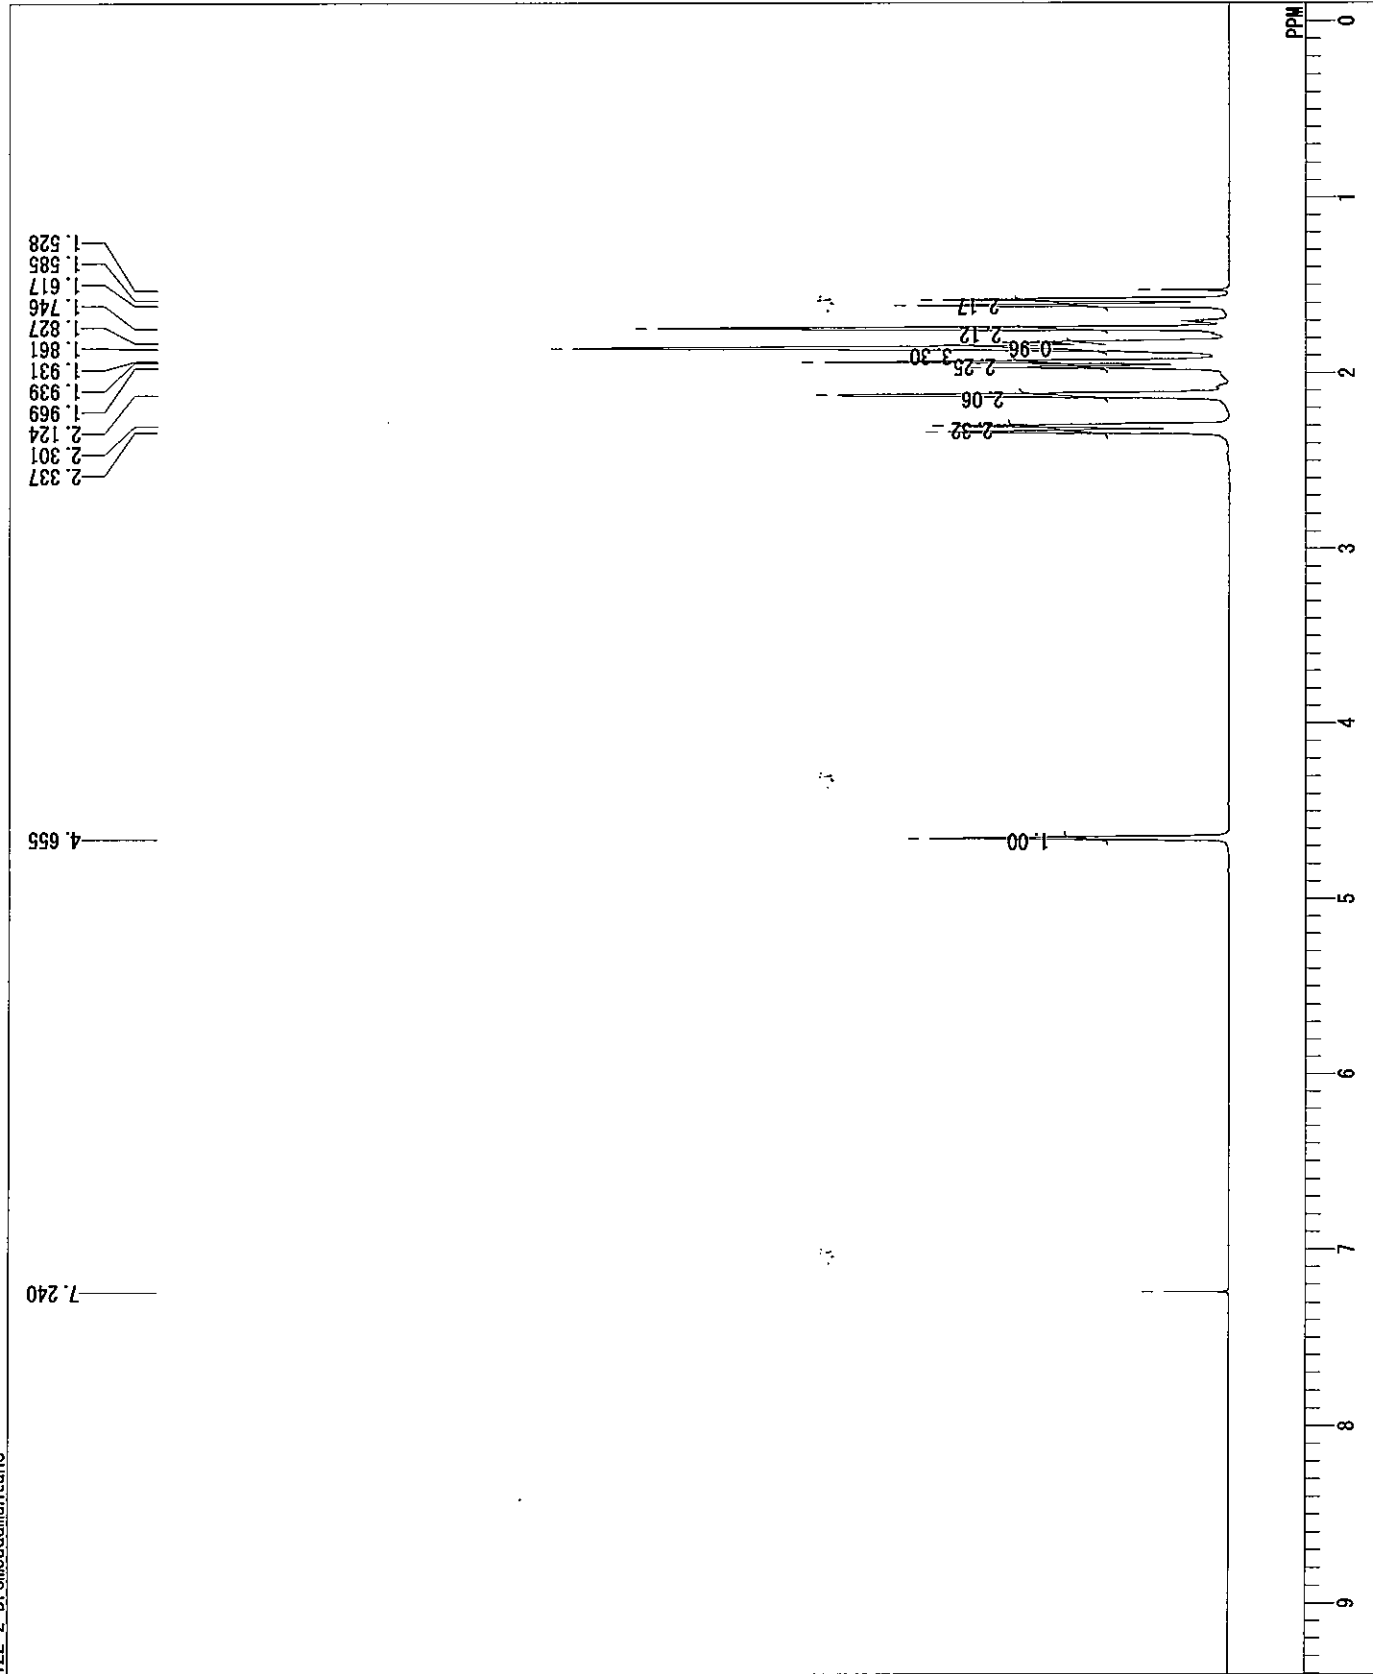





122\_1-bromo-4-tertiarybenzene

DFILE C:\W\in\Lambda\data\森田\Bromo\122\_1  
COMNT 122\_1-bromo-4-tertiarybenzene  
DATIM Sat Feb 19 09:41:56 2011  
OBNUC 1H  
EXMOD non  
OBFRQ 399.65 MHz  
OBSET 0.00 KHz  
OBFIN 134840.58 Hz  
POINT 16384  
FREQU 4911.59 Hz  
SCANS 3.3358 sec  
ACQTM 0.3284 sec  
PD 5.40 usec  
PWI 1H  
IRNUC 22.7 c  
CTEMP CDCL3  
SLVNT CDCL3  
EXREF 7.24 ppm  
BF 0.12 Hz  
RGAIN 7

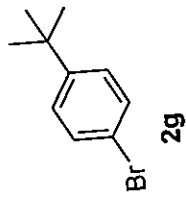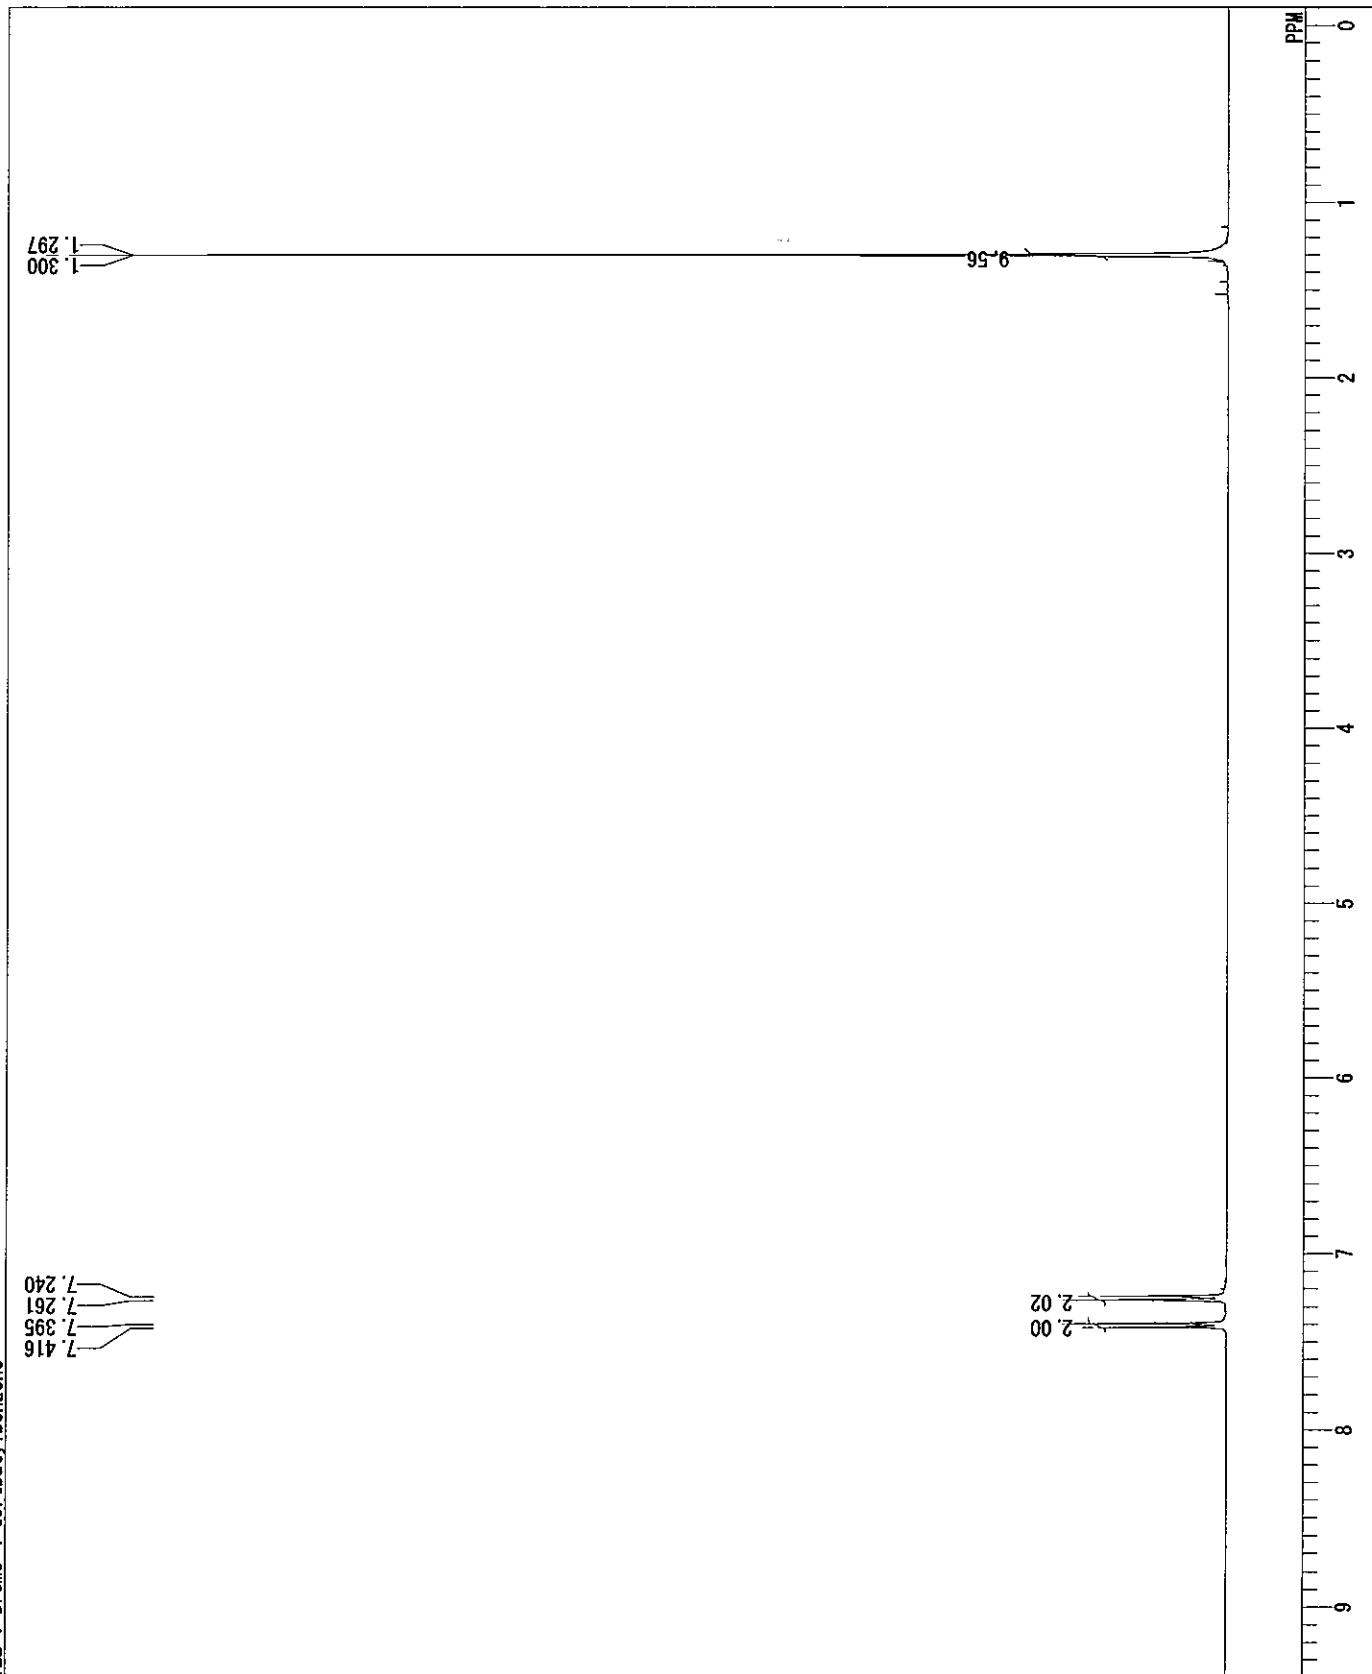

122\_1-bromo-4-tertbutylbenzene

DFILE  
COMNT  
DATIM  
OBNUC  
EXMOD  
OBFRO  
OBSST  
OBFIN  
POINT  
FREOU  
SCANS  
ACQTM  
PD  
PW1  
IRNUC  
CTEMP  
SLVNT  
EXREF  
BF  
RGAIN

C:\WIN\Lambdambda\DATA\森田\122\_1-bromo-4-tertbutylbenzene  
122\_1-bromo-4-tertbutylbenzene  
Sat Feb 19 09:51:34 2011  
13C  
bcm

100.40 MHz  
0.00 KHz  
135147.69 Hz  
32768  
59880.24 Hz  
174  
0.5472 sec  
1.3620 sec  
4.50 usec  
1H  
22.9 c  
CDCL3  
77.00 ppm  
0.12 Hz  
23

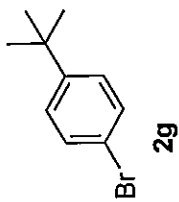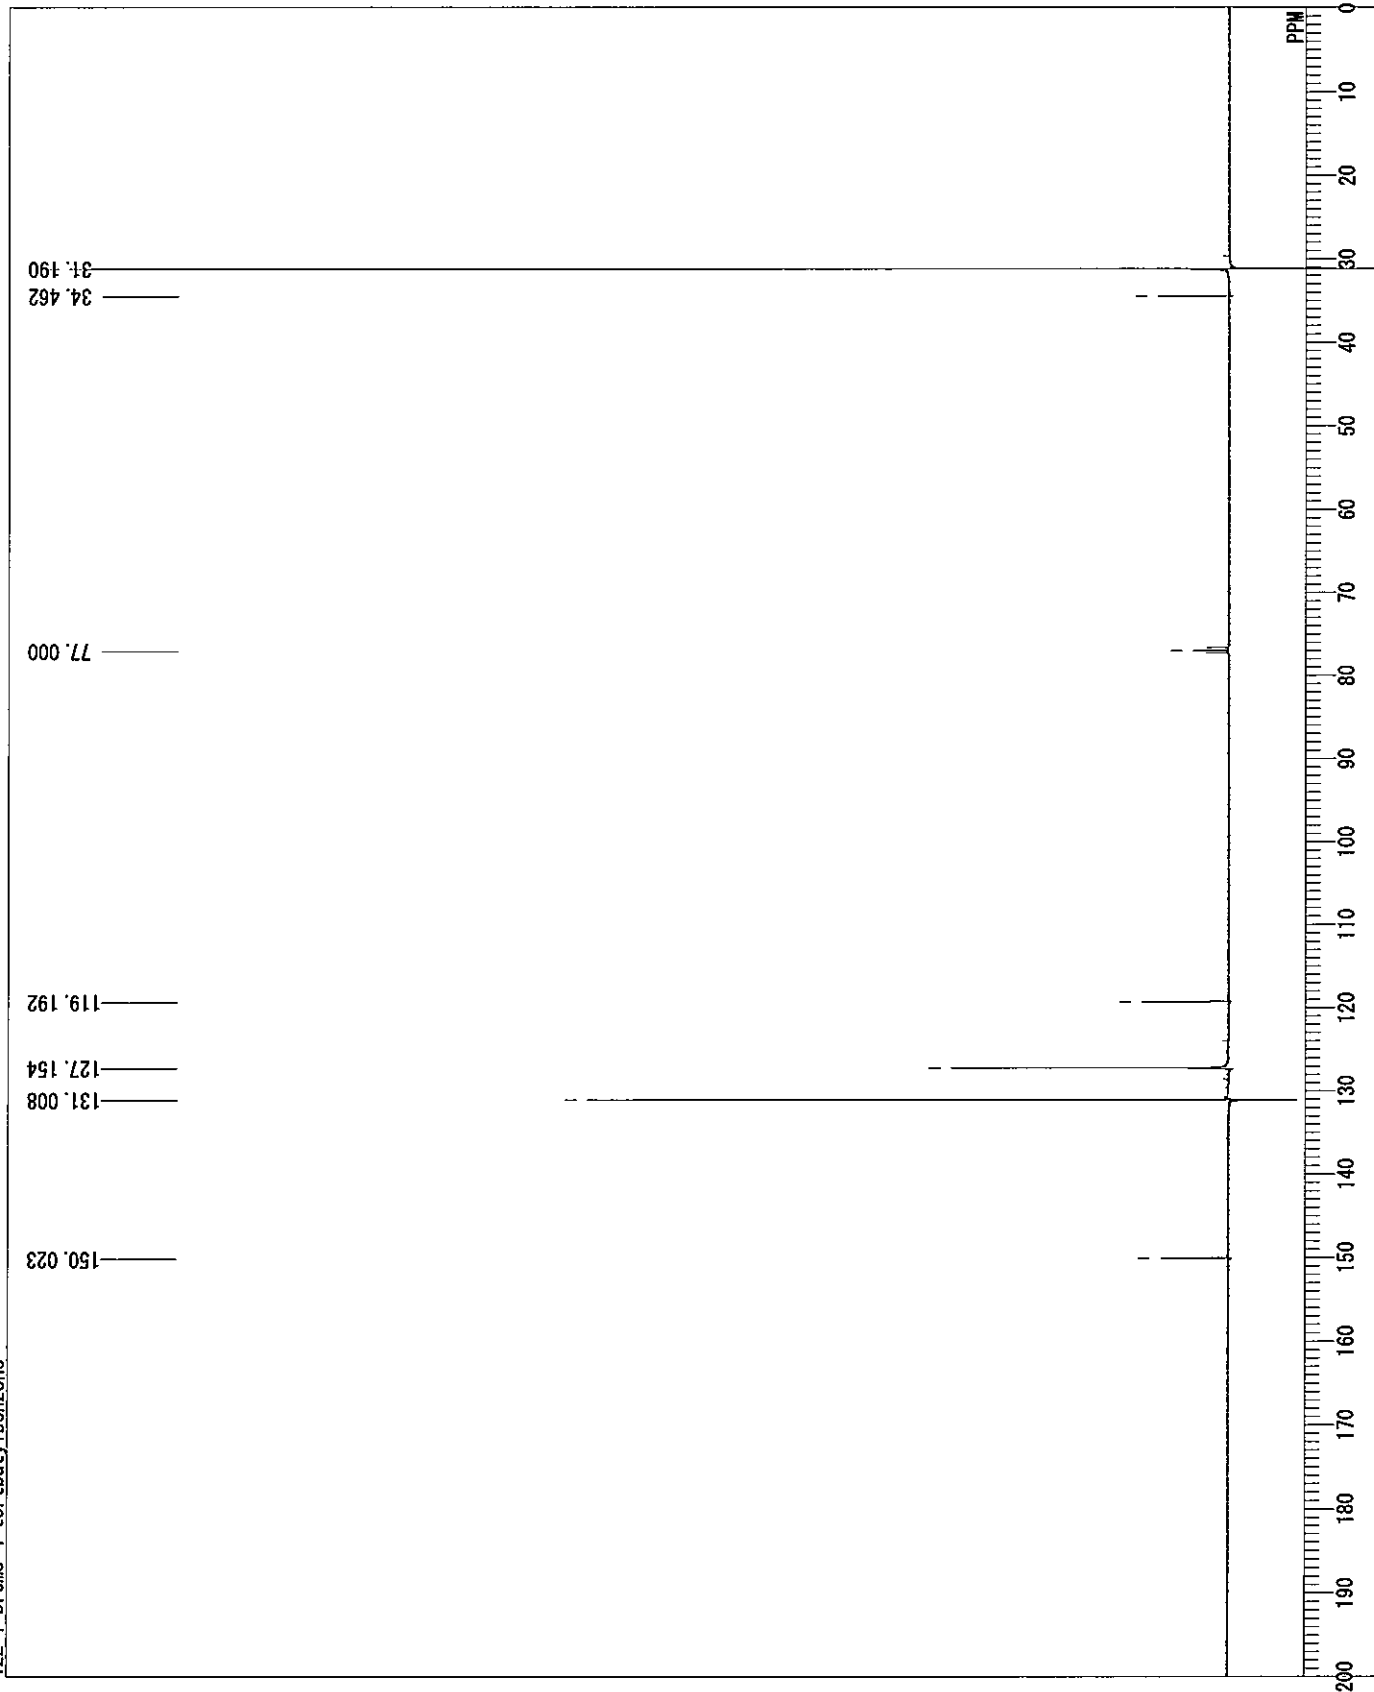

120517-5 Fr6

DFILE C:\WinLambdas\DATA\仁科\2012\120517-5 Fr6  
COMNT 120517-5 Fr6  
DATIM Fri May 18 10:57:18 2012  
OBNUC 1H  
EXMOD non  
OBFREQ 399.65 MHz  
OBSET 0.00 KHz  
OBFIN 134840.58 Hz  
POINT 16384  
FREQU 4911.59 Hz  
SCANS 4  
ACQTM 3.3358 sec  
PD 0.3280 sec  
PW1 5.40 usec  
IRNUC 1H  
CTEMP 24.1 c  
SLVNT CDCL3  
EXREF 5.93 ppm  
BF 0.07 Hz  
RGAIN 15

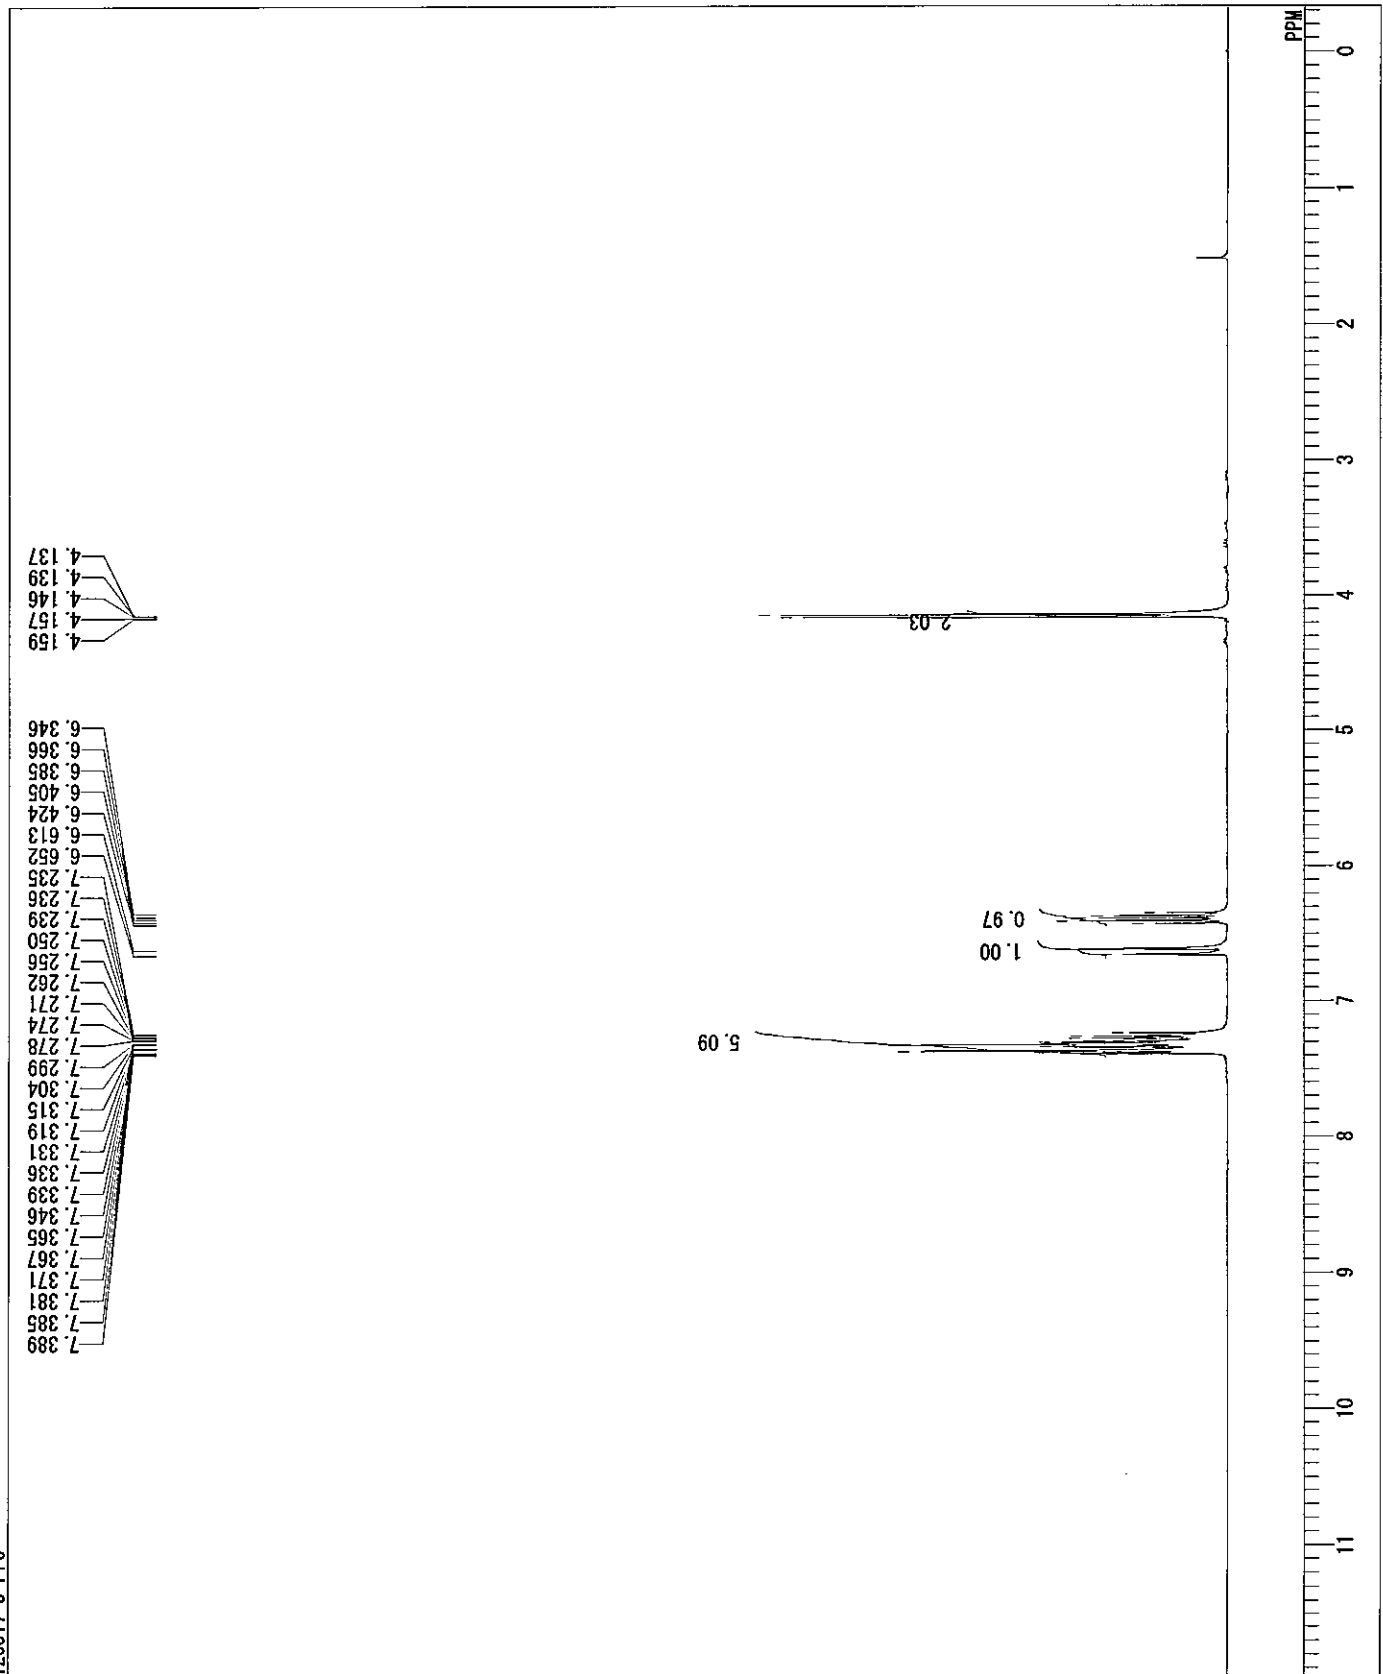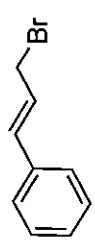

2h

120517-5 Fr6 13C

DFILE C:\WinLampda\DATA\仁科\2012\120517-5 Fr6 13C  
COMNT 120517-5 Fr6 13C  
DATIM Fri May 18 11:10:48 2012  
OBNUC 13C  
EXMOD bcm  
OBFRQ 100.40 MHz  
OBSET 0.00 KHz  
OBFIN 135147.69 Hz  
POINT 32768  
FREQU 59880.24 Hz  
SCANS 138  
ACQTM 0.5472 sec  
PD 1.3620 sec  
PW1 4.50 usec  
IRNUC 1H  
CTEMP 24.3 C  
SLVNT CDCL3  
EXREF 77.00 ppm  
BF 0.07 Hz  
RGAIN 24

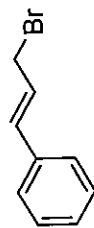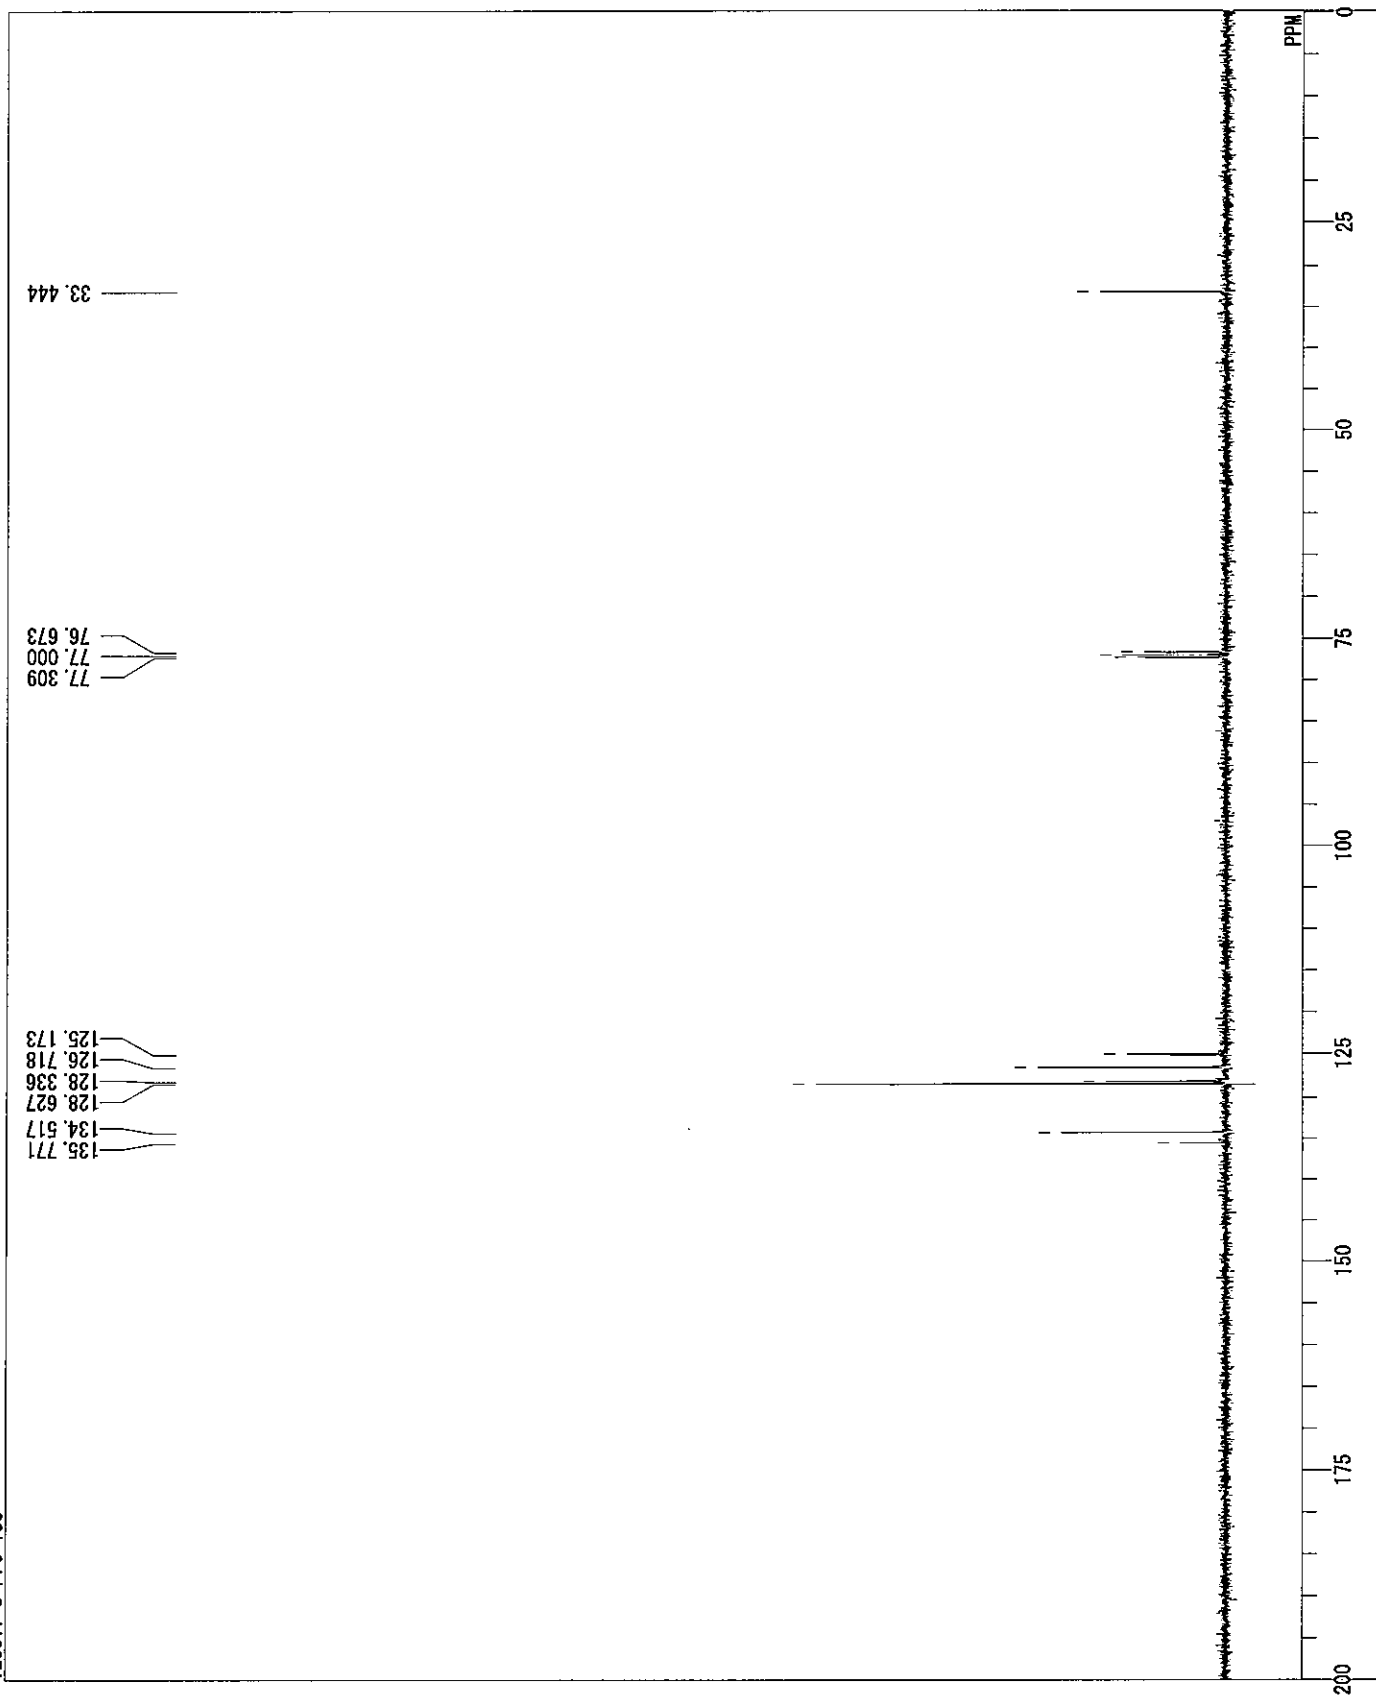

Supplement: c2ra22197g.pdf [file c2ra22197g.pdf]
